# Supplementary material for: Cefiderocol susceptibility endows hope in treating carbapenem-resistant Pseudomonas aeruginosa : insights from in vitro and in silico evidence
Source: Royal Society of Chemistry journal article supplement (doi:10.1039/d4ra04302b), 2024-01-01
Supplement: d4ra04302b1.pdf [file d4ra04302b1.pdf]

Supplementary File-S1 (Residue-level N-H S<sup>2</sup> values)

| Residues | PBP3_wild | PBP3_F533L | PBP3_T91A |
|----------|-----------|------------|-----------|
| 1        | 0.6       | 0.6        | 0.8633    |
| 2        | 0.61      | 0.61       | 0.8703    |
| 3        | 0.65      | 0.65       | 0.8896    |
| 4        | 0.71      | 0.71       | 0.9077    |
| 5        | 0.77      | 0.77       | 0.9306    |
| 6        | 0.8       | 0.8        | 0.9392    |
| 7        | 0.8       | 0.8        | 0.9239    |
| 8        | 0.8       | 0.8        | 0.9068    |
| 9        | 0.83      | 0.83       | 0.91305   |
| 10       | 0.87      | 0.87       | 0.93715   |
| 11       | 0.92      | 0.92       | 0.9778    |
| 12       | 0.97      | 0.97       | 1.01215   |
| 13       | 1.02      | 1.02       | 1.05215   |
| 14       | 1.07      | 1.07       | 1.0932    |
| 15       | 1.1       | 1.1        | 1.12275   |
| 16       | 1.14      | 1.14       | 1.14735   |
| 17       | 1.12      | 1.12       | 1.13235   |
| 18       | 1.12      | 1.12       | 1.1223    |
| 19       | 1.09      | 1.09       | 1.0927    |
| 20       | 1.06      | 1.06       | 1.0687    |
| 21       | 1.05      | 1.05       | 1.05825   |
| 22       | 1.04      | 1.04       | 1.0416    |
| 23       | 1.03      | 1.03       | 1.0311    |
| 24       | 1.01      | 1.01       | 1.0176    |
| 25       | 1.01      | 1.01       | 1.0104    |
| 26       | 1         | 1          | 0.9961    |
| 27       | 1         | 1          | 0.9972    |
| 28       | 1.01      | 1.01       | 1.0116    |
| 29       | 1.02      | 1.02       | 1.0238    |
| 30       | 1.05      | 1.05       | 1.0501    |
| 31       | 1.05      | 1.05       | 1.0503    |
| 32       | 1.05      | 1.05       | 1.047     |
| 33       | 1.05      | 1.05       | 1.0468    |
| 34       | 1.04      | 1.04       | 1.0365    |
| 35       | 1.03      | 1.03       | 1.0279    |
| 36       | 1         | 1          | 0.9979    |
| 37       | 0.97      | 0.97       | 0.9697    |
| 38       | 0.96      | 0.96       | 0.9643    |
| 39       | 0.96      | 0.96       | 0.9637    |
| 40       | 0.97      | 0.97       | 0.9728    |
| 41       | 0.96      | 0.96       | 0.9623    |
| 42       | 0.94      | 0.94       | 0.9355    |

| Residues | PBP3_wild | PBP3_F533L | PBP3_T91A |
|----------|-----------|------------|-----------|
| 43       | 0.88      | 0.88       | 0.8758    |
| 44       | 0.83      | 0.83       | 0.8322    |
| 45       | 0.79      | 0.79       | 0.7866    |
| 46       | 0.74      | 0.74       | 0.7424    |
| 47       | 0.72      | 0.72       | 0.7211    |
| 48       | 0.71      | 0.71       | 0.7141    |
| 49       | 0.73      | 0.73       | 0.7344    |
| 50       | 0.74      | 0.74       | 0.745     |
| 51       | 0.75      | 0.75       | 0.751     |
| 52       | 0.75      | 0.75       | 0.7505    |
| 53       | 0.78      | 0.78       | 0.7755    |
| 54       | 0.8       | 0.8        | 0.7973    |
| 55       | 0.81      | 0.81       | 0.8116    |
| 56       | 0.81      | 0.81       | 0.8054    |
| 57       | 0.79      | 0.79       | 0.794     |
| 58       | 0.79      | 0.79       | 0.7923    |
| 59       | 0.78      | 0.78       | 0.7833    |
| 60       | 0.78      | 0.78       | 0.7748    |
| 61       | 0.77      | 0.77       | 0.7659    |
| 62       | 0.75      | 0.75       | 0.7509    |
| 63       | 0.74      | 0.74       | 0.7382    |
| 64       | 0.74      | 0.74       | 0.7385    |
| 65       | 0.75      | 0.75       | 0.752     |
| 66       | 0.77      | 0.77       | 0.7698    |
| 67       | 0.75      | 0.75       | 0.7505    |
| 68       | 0.71      | 0.71       | 0.7125    |
| 69       | 0.68      | 0.68       | 0.6807    |
| 70       | 0.66      | 0.66       | 0.6634    |
| 71       | 0.68      | 0.68       | 0.678     |
| 72       | 0.69      | 0.69       | 0.6878    |
| 73       | 0.71      | 0.71       | 0.7083    |
| 74       | 0.72      | 0.72       | 0.7152    |
| 75       | 0.74      | 0.74       | 0.7435    |
| 76       | 0.76      | 0.76       | 0.7635    |
| 77       | 0.79      | 0.79       | 0.7949    |
| 78       | 0.81      | 0.81       | 0.809     |
| 79       | 0.83      | 0.83       | 0.8319    |
| 80       | 0.84      | 0.84       | 0.8433    |
| 81       | 0.84      | 0.84       | 0.8445    |
| 82       | 0.84      | 0.84       | 0.8412    |
| 83       | 0.83      | 0.83       | 0.8358    |
| 84       | 0.81      | 0.81       | 0.8194    |

Contd.. S1

| Residues | PBP3_wild | PBP3_F533L | PBP3_T91A |
|----------|-----------|------------|-----------|
| 85       | 0.82      | 0.82       | 0.8277    |
| 86       | 0.82      | 0.82       | 0.8286    |
| 87       | 0.82      | 0.82       | 0.8281    |
| 88       | 0.82      | 0.82       | 0.8339    |
| 89       | 0.83      | 0.83       | 0.8383    |
| 90       | 0.83      | 0.83       | 0.834     |
| 91       | 0.83      | 0.83       | 0.8231    |
| 92       | 0.83      | 0.83       | 0.8223    |
| 93       | 0.83      | 0.83       | 0.8295    |
| 94       | 0.84      | 0.84       | 0.8391    |
| 95       | 0.85      | 0.85       | 0.8425    |
| 96       | 0.86      | 0.86       | 0.8497    |
| 97       | 0.86      | 0.86       | 0.8548    |
| 98       | 0.85      | 0.85       | 0.8448    |
| 99       | 0.84      | 0.84       | 0.838     |
| 100      | 0.83      | 0.83       | 0.8253    |
| 101      | 0.81      | 0.81       | 0.8054    |
| 102      | 0.79      | 0.79       | 0.7822    |
| 103      | 0.77      | 0.77       | 0.7696    |
| 104      | 0.78      | 0.78       | 0.7752    |
| 105      | 0.79      | 0.79       | 0.7872    |
| 106      | 0.82      | 0.82       | 0.8132    |
| 107      | 0.82      | 0.82       | 0.816     |
| 108      | 0.82      | 0.82       | 0.8219    |
| 109      | 0.84      | 0.84       | 0.8419    |
| 110      | 0.86      | 0.86       | 0.8603    |
| 111      | 0.88      | 0.88       | 0.8731    |
| 112      | 0.88      | 0.88       | 0.877     |
| 113      | 0.86      | 0.86       | 0.8603    |
| 114      | 0.86      | 0.86       | 0.8571    |
| 115      | 0.83      | 0.83       | 0.8275    |
| 116      | 0.81      | 0.81       | 0.8044    |
| 117      | 0.81      | 0.81       | 0.8076    |
| 118      | 0.82      | 0.82       | 0.8171    |
| 119      | 0.85      | 0.85       | 0.8484    |
| 120      | 0.88      | 0.88       | 0.8824    |
| 121      | 0.92      | 0.92       | 0.9163    |
| 122      | 0.94      | 0.94       | 0.9416    |
| 123      | 0.95      | 0.95       | 0.9553    |
| 124      | 0.96      | 0.96       | 0.9556    |
| 125      | 0.93      | 0.93       | 0.9297    |
| 126      | 0.91      | 0.91       | 0.9127    |

| Residues | PBP3_wild | PBP3_F533L | PBP3_T91A |
|----------|-----------|------------|-----------|
| 127      | 0.86      | 0.86       | 0.8591    |
| 128      | 0.81      | 0.81       | 0.809     |
| 129      | 0.79      | 0.79       | 0.7867    |
| 130      | 0.77      | 0.77       | 0.7728    |
| 131      | 0.76      | 0.76       | 0.7561    |
| 132      | 0.75      | 0.75       | 0.7499    |
| 133      | 0.74      | 0.74       | 0.7405    |
| 134      | 0.74      | 0.74       | 0.7398    |
| 135      | 0.77      | 0.77       | 0.7666    |
| 136      | 0.79      | 0.79       | 0.7895    |
| 137      | 0.83      | 0.83       | 0.834     |
| 138      | 0.87      | 0.87       | 0.868     |
| 139      | 0.88      | 0.88       | 0.8817    |
| 140      | 0.88      | 0.88       | 0.8795    |
| 141      | 0.88      | 0.88       | 0.877     |
| 142      | 0.88      | 0.88       | 0.8816    |
| 143      | 0.86      | 0.86       | 0.86      |
| 144      | 0.85      | 0.85       | 0.8473    |
| 145      | 0.86      | 0.86       | 0.8588    |
| 146      | 0.87      | 0.87       | 0.8715    |
| 147      | 0.89      | 0.89       | 0.8907    |
| 148      | 0.9       | 0.9        | 0.8975    |
| 149      | 0.91      | 0.91       | 0.9128    |
| 150      | 0.91      | 0.91       | 0.9138    |
| 151      | 0.9       | 0.9        | 0.9035    |
| 152      | 0.9       | 0.9        | 0.8986    |
| 153      | 0.9       | 0.9        | 0.8957    |
| 154      | 0.87      | 0.87       | 0.8698    |
| 155      | 0.85      | 0.85       | 0.8541    |
| 156      | 0.82      | 0.82       | 0.8202    |
| 157      | 0.8       | 0.8        | 0.7992    |
| 158      | 0.78      | 0.78       | 0.7792    |
| 159      | 0.78      | 0.78       | 0.7792    |
| 160      | 0.8       | 0.8        | 0.804     |
| 161      | 0.82      | 0.82       | 0.8253    |
| 162      | 0.85      | 0.85       | 0.8486    |
| 163      | 0.86      | 0.86       | 0.8613    |
| 164      | 0.85      | 0.85       | 0.8536    |
| 165      | 0.84      | 0.84       | 0.8413    |
| 166      | 0.84      | 0.84       | 0.8369    |
| 167      | 0.85      | 0.85       | 0.8527    |
| 168      | 0.86      | 0.86       | 0.8588    |

Contd.. S1

| Residues | PBP3_wild | PBP3_F533L | PBP3_T91A |
|----------|-----------|------------|-----------|
| 169      | 0.87      | 0.87       | 0.8679    |
| 170      | 0.86      | 0.86       | 0.86      |
| 171      | 0.85      | 0.85       | 0.8497    |
| 172      | 0.82      | 0.82       | 0.8242    |
| 173      | 0.79      | 0.79       | 0.786     |
| 174      | 0.75      | 0.75       | 0.7538    |
| 175      | 0.76      | 0.76       | 0.7587    |
| 176      | 0.78      | 0.78       | 0.7839    |
| 177      | 0.8       | 0.8        | 0.8031    |
| 178      | 0.83      | 0.83       | 0.8344    |
| 179      | 0.86      | 0.86       | 0.862     |
| 180      | 0.88      | 0.88       | 0.8749    |
| 181      | 0.9       | 0.9        | 0.8948    |
| 182      | 0.93      | 0.93       | 0.9269    |
| 183      | 0.94      | 0.94       | 0.9366    |
| 184      | 0.93      | 0.93       | 0.9251    |
| 185      | 0.9       | 0.9        | 0.9005    |
| 186      | 0.86      | 0.86       | 0.8559    |
| 187      | 0.82      | 0.82       | 0.8194    |
| 188      | 0.8       | 0.8        | 0.795     |
| 189      | 0.79      | 0.79       | 0.785     |
| 190      | 0.77      | 0.77       | 0.7702    |
| 191      | 0.77      | 0.77       | 0.7706    |
| 192      | 0.78      | 0.78       | 0.7786    |
| 193      | 0.79      | 0.79       | 0.7917    |
| 194      | 0.8       | 0.8        | 0.8014    |
| 195      | 0.81      | 0.81       | 0.8123    |
| 196      | 0.82      | 0.82       | 0.8165    |
| 197      | 0.82      | 0.82       | 0.8207    |
| 198      | 0.82      | 0.82       | 0.8169    |
| 199      | 0.8       | 0.8        | 0.7961    |
| 200      | 0.77      | 0.77       | 0.7739    |
| 201      | 0.76      | 0.76       | 0.7643    |
| 202      | 0.79      | 0.79       | 0.7899    |
| 203      | 0.81      | 0.81       | 0.8096    |
| 204      | 0.84      | 0.84       | 0.8374    |
| 205      | 0.86      | 0.86       | 0.8603    |
| 206      | 0.87      | 0.87       | 0.8696    |
| 207      | 0.86      | 0.86       | 0.8641    |
| 208      | 0.84      | 0.84       | 0.8377    |
| 209      | 0.82      | 0.82       | 0.8236    |
| 210      | 0.81      | 0.81       | 0.805     |

| Residues | PBP3_wild | PBP3_F533L | PBP3_T91A |
|----------|-----------|------------|-----------|
| 211      | 0.78      | 0.78       | 0.7747    |
| 212      | 0.75      | 0.75       | 0.7528    |
| 213      | 0.74      | 0.74       | 0.7387    |
| 214      | 0.73      | 0.73       | 0.7281    |
| 215      | 0.72      | 0.72       | 0.7221    |
| 216      | 0.74      | 0.74       | 0.7369    |
| 217      | 0.76      | 0.76       | 0.758     |
| 218      | 0.8       | 0.8        | 0.8002    |
| 219      | 0.84      | 0.84       | 0.84      |
| 220      | 0.85      | 0.85       | 0.8551    |
| 221      | 0.88      | 0.88       | 0.8783    |
| 222      | 0.9       | 0.9        | 0.8966    |
| 223      | 0.92      | 0.92       | 0.9187    |
| 224      | 0.93      | 0.93       | 0.9314    |
| 225      | 0.92      | 0.92       | 0.9231    |
| 226      | 0.91      | 0.91       | 0.9104    |
| 227      | 0.9       | 0.9        | 0.9007    |
| 228      | 0.9       | 0.9        | 0.8961    |
| 229      | 0.89      | 0.89       | 0.8916    |
| 230      | 0.89      | 0.89       | 0.8856    |
| 231      | 0.89      | 0.89       | 0.8898    |
| 232      | 0.91      | 0.91       | 0.9111    |
| 233      | 0.89      | 0.89       | 0.891     |
| 234      | 0.88      | 0.88       | 0.8781    |
| 235      | 0.86      | 0.86       | 0.8638    |
| 236      | 0.85      | 0.85       | 0.8534    |
| 237      | 0.84      | 0.84       | 0.8435    |
| 238      | 0.83      | 0.83       | 0.8273    |
| 239      | 0.81      | 0.81       | 0.8143    |
| 240      | 0.81      | 0.81       | 0.8065    |
| 241      | 0.78      | 0.78       | 0.7784    |
| 242      | 0.74      | 0.74       | 0.7416    |
| 243      | 0.73      | 0.73       | 0.7283    |
| 244      | 0.72      | 0.72       | 0.7221    |
| 245      | 0.72      | 0.72       | 0.7241    |
| 246      | 0.74      | 0.74       | 0.7379    |
| 247      | 0.75      | 0.75       | 0.7482    |
| 248      | 0.77      | 0.77       | 0.7713    |
| 249      | 0.8       | 0.8        | 0.7947    |
| 250      | 0.83      | 0.83       | 0.8286    |
| 251      | 0.85      | 0.85       | 0.8488    |
| 252      | 0.85      | 0.85       | 0.8547    |

Contd.. S1

| Residues | PBP3_wild | PBP3_F533L | PBP3_T91A |
|----------|-----------|------------|-----------|
| 253      | 0.86      | 0.86       | 0.856     |
| 254      | 0.85      | 0.85       | 0.8497    |
| 255      | 0.83      | 0.83       | 0.8286    |
| 256      | 0.81      | 0.81       | 0.8114    |
| 257      | 0.8       | 0.8        | 0.7982    |
| 258      | 0.8       | 0.8        | 0.8039    |
| 259      | 0.8       | 0.8        | 0.7962    |
| 260      | 0.8       | 0.8        | 0.7976    |
| 261      | 0.79      | 0.79       | 0.7876    |
| 262      | 0.78      | 0.78       | 0.7794    |
| 263      | 0.76      | 0.76       | 0.7574    |
| 264      | 0.75      | 0.75       | 0.75      |
| 265      | 0.75      | 0.75       | 0.7528    |
| 266      | 0.74      | 0.74       | 0.7449    |
| 267      | 0.75      | 0.75       | 0.7488    |
| 268      | 0.74      | 0.74       | 0.7375    |
| 269      | 0.72      | 0.72       | 0.7251    |
| 270      | 0.71      | 0.71       | 0.71      |
| 271      | 0.71      | 0.71       | 0.7146    |
| 272      | 0.72      | 0.72       | 0.7235    |
| 273      | 0.73      | 0.73       | 0.7287    |
| 274      | 0.75      | 0.75       | 0.7495    |
| 275      | 0.76      | 0.76       | 0.7584    |
| 276      | 0.76      | 0.76       | 0.7583    |
| 277      | 0.76      | 0.76       | 0.7644    |
| 278      | 0.76      | 0.76       | 0.7641    |
| 279      | 0.76      | 0.76       | 0.763     |
| 280      | 0.75      | 0.75       | 0.7535    |
| 281      | 0.76      | 0.76       | 0.7625    |
| 282      | 0.76      | 0.76       | 0.7629    |
| 283      | 0.76      | 0.76       | 0.7641    |
| 284      | 0.77      | 0.77       | 0.7686    |
| 285      | 0.77      | 0.77       | 0.771     |
| 286      | 0.79      | 0.79       | 0.7871    |
| 287      | 0.8       | 0.8        | 0.7993    |
| 288      | 0.81      | 0.81       | 0.8049    |
| 289      | 0.79      | 0.79       | 0.7943    |
| 290      | 0.77      | 0.77       | 0.768     |
| 291      | 0.75      | 0.75       | 0.7519    |
| 292      | 0.72      | 0.72       | 0.7226    |
| 293      | 0.7       | 0.7        | 0.7032    |
| 294      | 0.71      | 0.71       | 0.7142    |

| Residues | PBP3_wild | PBP3_F533L | PBP3_T91A |
|----------|-----------|------------|-----------|
| 295      | 0.73      | 0.73       | 0.7303    |
| 296      | 0.76      | 0.76       | 0.7597    |
| 297      | 0.78      | 0.78       | 0.7787    |
| 298      | 0.77      | 0.77       | 0.7692    |
| 299      | 0.78      | 0.78       | 0.7755    |
| 300      | 0.77      | 0.77       | 0.7691    |
| 301      | 0.77      | 0.77       | 0.7664    |
| 302      | 0.75      | 0.75       | 0.7487    |
| 303      | 0.75      | 0.75       | 0.7516    |
| 304      | 0.75      | 0.75       | 0.7479    |
| 305      | 0.74      | 0.74       | 0.7385    |
| 306      | 0.72      | 0.72       | 0.7214    |
| 307      | 0.7       | 0.7        | 0.7036    |
| 308      | 0.7       | 0.7        | 0.7016    |
| 309      | 0.72      | 0.72       | 0.7215    |
| 310      | 0.74      | 0.74       | 0.7453    |
| 311      | 0.77      | 0.77       | 0.7736    |
| 312      | 0.79      | 0.79       | 0.7864    |
| 313      | 0.79      | 0.79       | 0.7922    |
| 314      | 0.81      | 0.81       | 0.8122    |
| 315      | 0.82      | 0.82       | 0.8245    |
| 316      | 0.84      | 0.84       | 0.8455    |
| 317      | 0.86      | 0.86       | 0.861     |
| 318      | 0.86      | 0.86       | 0.86      |
| 319      | 0.85      | 0.85       | 0.8473    |
| 320      | 0.82      | 0.82       | 0.8221    |
| 321      | 0.81      | 0.81       | 0.811     |
| 322      | 0.81      | 0.81       | 0.8123    |
| 323      | 0.82      | 0.82       | 0.8244    |
| 324      | 0.84      | 0.84       | 0.8398    |
| 325      | 0.83      | 0.83       | 0.8307    |
| 326      | 0.83      | 0.83       | 0.8317    |
| 327      | 0.86      | 0.86       | 0.8565    |
| 328      | 0.88      | 0.88       | 0.8842    |
| 329      | 0.91      | 0.91       | 0.9048    |
| 330      | 0.91      | 0.91       | 0.9107    |
| 331      | 0.91      | 0.91       | 0.9055    |
| 332      | 0.89      | 0.89       | 0.8921    |
| 333      | 0.87      | 0.87       | 0.8703    |
| 334      | 0.84      | 0.84       | 0.837     |
| 335      | 0.81      | 0.81       | 0.8077    |
| 336      | 0.79      | 0.79       | 0.7935    |

Contd.. S1

| Residues | PBP3_wild | PBP3_F533L | PBP3_T91A |
|----------|-----------|------------|-----------|
| 337      | 0.81      | 0.81       | 0.8066    |
| 338      | 0.82      | 0.82       | 0.825     |
| 339      | 0.85      | 0.85       | 0.8535    |
| 340      | 0.88      | 0.88       | 0.8772    |
| 341      | 0.88      | 0.88       | 0.8839    |
| 342      | 0.89      | 0.89       | 0.8884    |
| 343      | 0.89      | 0.89       | 0.8846    |
| 344      | 0.87      | 0.87       | 0.869     |
| 345      | 0.87      | 0.87       | 0.8743    |
| 346      | 0.88      | 0.88       | 0.8799    |
| 347      | 0.87      | 0.87       | 0.8742    |
| 348      | 0.86      | 0.86       | 0.8573    |
| 349      | 0.83      | 0.83       | 0.8304    |
| 350      | 0.81      | 0.81       | 0.8059    |
| 351      | 0.79      | 0.79       | 0.7913    |
| 352      | 0.8       | 0.8        | 0.7955    |
| 353      | 0.8       | 0.8        | 0.7986    |
| 354      | 0.82      | 0.82       | 0.8178    |
| 355      | 0.84      | 0.84       | 0.8415    |
| 356      | 0.85      | 0.85       | 0.8526    |
| 357      | 0.87      | 0.87       | 0.872     |
| 358      | 0.9       | 0.9        | 0.9006    |
| 359      | 0.89      | 0.89       | 0.8903    |
| 360      | 0.88      | 0.88       | 0.8817    |
| 361      | 0.85      | 0.85       | 0.8531    |
| 362      | 0.82      | 0.82       | 0.8229    |
| 363      | 0.82      | 0.82       | 0.8209    |
| 364      | 0.84      | 0.84       | 0.8375    |
| 365      | 0.86      | 0.86       | 0.8564    |
| 366      | 0.86      | 0.86       | 0.8635    |
| 367      | 0.88      | 0.88       | 0.881     |
| 368      | 0.89      | 0.89       | 0.8847    |
| 369      | 0.88      | 0.88       | 0.8813    |
| 370      | 0.86      | 0.86       | 0.864     |
| 371      | 0.84      | 0.84       | 0.8428    |
| 372      | 0.82      | 0.82       | 0.8172    |
| 373      | 0.77      | 0.77       | 0.7723    |
| 374      | 0.74      | 0.74       | 0.7403    |
| 375      | 0.72      | 0.72       | 0.7246    |
| 376      | 0.72      | 0.72       | 0.7172    |
| 377      | 0.73      | 0.73       | 0.7349    |
| 378      | 0.75      | 0.75       | 0.7493    |

| Residues | PBP3_wild | PBP3_F533L | PBP3_T91A |
|----------|-----------|------------|-----------|
| 379      | 0.73      | 0.73       | 0.7278    |
| 380      | 0.69      | 0.69       | 0.6954    |
| 381      | 0.7       | 0.7        | 0.6959    |
| 382      | 0.7       | 0.7        | 0.705     |
| 383      | 0.72      | 0.72       | 0.7233    |
| 384      | 0.73      | 0.73       | 0.73      |
| 385      | 0.72      | 0.72       | 0.7209    |
| 386      | 0.72      | 0.72       | 0.7232    |
| 387      | 0.72      | 0.72       | 0.7168    |
| 388      | 0.7       | 0.7        | 0.7054    |
| 389      | 0.69      | 0.69       | 0.6913    |
| 390      | 0.7       | 0.7        | 0.6967    |
| 391      | 0.71      | 0.71       | 0.7141    |
| 392      | 0.72      | 0.72       | 0.7167    |
| 393      | 0.73      | 0.73       | 0.7329    |
| 394      | 0.76      | 0.76       | 0.7598    |
| 395      | 0.78      | 0.78       | 0.7784    |
| 396      | 0.8       | 0.8        | 0.7963    |
| 397      | 0.81      | 0.81       | 0.8095    |
| 398      | 0.81      | 0.81       | 0.8109    |
| 399      | 0.82      | 0.82       | 0.8161    |
| 400      | 0.82      | 0.82       | 0.8185    |
| 401      | 0.83      | 0.83       | 0.834     |
| 402      | 0.85      | 0.85       | 0.8463    |
| 403      | 0.85      | 0.85       | 0.8475    |
| 404      | 0.86      | 0.86       | 0.8594    |
| 405      | 0.85      | 0.85       | 0.8502    |
| 406      | 0.85      | 0.85       | 0.8474    |
| 407      | 0.84      | 0.84       | 0.8376    |
| 408      | 0.81      | 0.81       | 0.8149    |
| 409      | 0.81      | 0.81       | 0.8136    |
| 410      | 0.82      | 0.82       | 0.8181    |
| 411      | 0.83      | 0.83       | 0.8279    |
| 412      | 0.85      | 0.85       | 0.8508    |
| 413      | 0.88      | 0.88       | 0.8758    |
| 414      | 0.89      | 0.89       | 0.8861    |
| 415      | 0.9       | 0.9        | 0.8963    |
| 416      | 0.89      | 0.89       | 0.8847    |
| 417      | 0.89      | 0.89       | 0.8874    |
| 418      | 0.89      | 0.89       | 0.8894    |
| 419      | 0.89      | 0.89       | 0.8861    |
| 420      | 0.9       | 0.9        | 0.8995    |

Contd.. S1

| Residues | PBP3_wild | PBP3_F533L | PBP3_T91A |
|----------|-----------|------------|-----------|
| 421      | 0.9       | 0.9        | 0.9014    |
| 422      | 0.89      | 0.89       | 0.885     |
| 423      | 0.86      | 0.86       | 0.8576    |
| 424      | 0.83      | 0.83       | 0.8303    |
| 425      | 0.8       | 0.8        | 0.7998    |
| 426      | 0.77      | 0.77       | 0.7726    |
| 427      | 0.75      | 0.75       | 0.7501    |
| 428      | 0.74      | 0.74       | 0.7423    |
| 429      | 0.73      | 0.73       | 0.7291    |
| 430      | 0.73      | 0.73       | 0.7334    |
| 431      | 0.74      | 0.74       | 0.7415    |
| 432      | 0.77      | 0.77       | 0.7651    |
| 433      | 0.76      | 0.76       | 0.7586    |
| 434      | 0.77      | 0.77       | 0.7672    |
| 435      | 0.77      | 0.77       | 0.7655    |
| 436      | 0.77      | 0.77       | 0.7675    |
| 437      | 0.77      | 0.77       | 0.7674    |
| 438      | 0.78      | 0.78       | 0.78      |
| 439      | 0.79      | 0.79       | 0.7939    |
| 440      | 0.8       | 0.8        | 0.7951    |
| 441      | 0.77      | 0.77       | 0.7732    |
| 442      | 0.77      | 0.77       | 0.766     |
| 443      | 0.75      | 0.75       | 0.7508    |
| 444      | 0.75      | 0.75       | 0.7519    |
| 445      | 0.74      | 0.74       | 0.7455    |
| 446      | 0.76      | 0.76       | 0.7574    |
| 447      | 0.78      | 0.78       | 0.7779    |
| 448      | 0.8       | 0.8        | 0.7957    |
| 449      | 0.81      | 0.81       | 0.8079    |
| 450      | 0.81      | 0.81       | 0.8078    |
| 451      | 0.79      | 0.79       | 0.7919    |
| 452      | 0.79      | 0.79       | 0.7898    |
| 453      | 0.8       | 0.8        | 0.7969    |
| 454      | 0.81      | 0.81       | 0.8091    |
| 455      | 0.81      | 0.81       | 0.8086    |
| 456      | 0.81      | 0.81       | 0.8145    |
| 457      | 0.82      | 0.82       | 0.8168    |
| 458      | 0.81      | 0.81       | 0.8108    |
| 459      | 0.8       | 0.8        | 0.804     |
| 460      | 0.81      | 0.81       | 0.8138    |
| 461      | 0.83      | 0.83       | 0.828     |
| 462      | 0.85      | 0.85       | 0.8503    |

| Residues | PBP3_wild | PBP3_F533L | PBP3_T91A |
|----------|-----------|------------|-----------|
| 463      | 0.86      | 0.86       | 0.8654    |
| 464      | 0.88      | 0.88       | 0.8757    |
| 465      | 0.87      | 0.87       | 0.8658    |
| 466      | 0.84      | 0.84       | 0.8448    |
| 467      | 0.81      | 0.81       | 0.8084    |
| 468      | 0.77      | 0.77       | 0.7693    |
| 469      | 0.76      | 0.76       | 0.759     |
| 470      | 0.76      | 0.76       | 0.7581    |
| 471      | 0.79      | 0.79       | 0.785     |
| 472      | 0.81      | 0.81       | 0.8146    |
| 473      | 0.83      | 0.83       | 0.8287    |
| 474      | 0.81      | 0.81       | 0.8079    |
| 475      | 0.77      | 0.77       | 0.7708    |
| 476      | 0.76      | 0.76       | 0.7565    |
| 477      | 0.73      | 0.73       | 0.7349    |
| 478      | 0.74      | 0.74       | 0.7435    |
| 479      | 0.74      | 0.74       | 0.743     |
| 480      | 0.74      | 0.74       | 0.7436    |
| 481      | 0.72      | 0.72       | 0.7239    |
| 482      | 0.7       | 0.7        | 0.6963    |
| 483      | 0.67      | 0.67       | 0.6718    |
| 484      | 0.67      | 0.67       | 0.6691    |
| 485      | 0.66      | 0.66       | 0.6628    |
| 486      | 0.67      | 0.67       | 0.6694    |
| 487      | 0.69      | 0.69       | 0.6925    |
| 488      | 0.73      | 0.73       | 0.7342    |
| 489      | 0.77      | 0.77       | 0.7646    |
| 490      | 0.77      | 0.77       | 0.7698    |
| 491      | 0.77      | 0.77       | 0.7663    |
| 492      | 0.75      | 0.75       | 0.754     |
| 493      | 0.74      | 0.74       | 0.7438    |
| 494      | 0.74      | 0.74       | 0.7387    |
| 495      | 0.73      | 0.73       | 0.7329    |
| 496      | 0.73      | 0.73       | 0.7319    |
| 497      | 0.74      | 0.74       | 0.7402    |
| 498      | 0.77      | 0.77       | 0.7725    |
| 499      | 0.81      | 0.81       | 0.808     |
| 500      | 0.82      | 0.82       | 0.8251    |
| 501      | 0.83      | 0.83       | 0.8336    |
| 502      | 0.84      | 0.84       | 0.8367    |
| 503      | 0.86      | 0.86       | 0.8565    |
| 504      | 0.85      | 0.85       | 0.8542    |

Contd.. S1

| Residues | PBP3_wild | PBP3_F533L | PBP3_T91A |
|----------|-----------|------------|-----------|
| 505      | 0.85      | 0.85       | 0.8485    |
| 506      | 0.85      | 0.85       | 0.8506    |
| 507      | 0.85      | 0.85       | 0.8484    |
| 508      | 0.83      | 0.82       | 0.8282    |
| 509      | 0.8       | 0.8        | 0.8028    |
| 510      | 0.79      | 0.79       | 0.793     |
| 511      | 0.79      | 0.79       | 0.7918    |
| 512      | 0.79      | 0.78       | 0.7862    |
| 513      | 0.79      | 0.79       | 0.7898    |
| 514      | 0.81      | 0.81       | 0.8095    |
| 515      | 0.83      | 0.83       | 0.8321    |
| 516      | 0.84      | 0.84       | 0.8413    |
| 517      | 0.86      | 0.86       | 0.8641    |
| 518      | 0.88      | 0.88       | 0.8812    |
| 519      | 0.9       | 0.89       | 0.8974    |
| 520      | 0.92      | 0.92       | 0.9218    |
| 521      | 0.93      | 0.93       | 0.9309    |
| 522      | 0.94      | 0.94       | 0.9432    |
| 523      | 0.94      | 0.94       | 0.9376    |
| 524      | 0.93      | 0.93       | 0.93      |
| 525      | 0.91      | 0.91       | 0.9121    |
| 526      | 0.87      | 0.88       | 0.8741    |
| 527      | 0.83      | 0.84       | 0.8346    |
| 528      | 0.8       | 0.8        | 0.7999    |
| 529      | 0.77      | 0.77       | 0.7711    |
| 530      | 0.76      | 0.76       | 0.7586    |
| 531      | 0.75      | 0.75       | 0.7535    |
| 532      | 0.76      | 0.75       | 0.764     |
| 533      | 0.76      | 0.74       | 0.7643    |
| 534      | 0.75      | 0.74       | 0.7525    |
| 535      | 0.75      | 0.73       | 0.747     |
| 536      | 0.76      | 0.75       | 0.758     |
| 537      | 0.79      | 0.79       | 0.7943    |
| 538      | 0.82      | 0.81       | 0.8169    |
| 539      | 0.83      | 0.82       | 0.8262    |
| 540      | 0.83      | 0.82       | 0.8276    |
| 541      | 0.85      | 0.84       | 0.8475    |
| 542      | 0.85      | 0.85       | 0.8519    |
| 543      | 0.85      | 0.84       | 0.8501    |
| 544      | 0.85      | 0.84       | 0.85      |
| 545      | 0.84      | 0.83       | 0.8383    |
| 546      | 0.83      | 0.83       | 0.8345    |

| Residues | PBP3_wild | PBP3_F533L | PBP3_T91A |
|----------|-----------|------------|-----------|
| 547      | 0.81      | 0.81       | 0.8147    |
| 548      | 0.8       | 0.79       | 0.7958    |
| 549      | 0.8       | 0.8        | 0.7994    |
| 550      | 0.8       | 0.79       | 0.7981    |
| 551      | 0.81      | 0.8        | 0.8099    |
| 552      | 0.8       | 0.8        | 0.803     |
| 553      | 0.78      | 0.78       | 0.7801    |
| 554      | 0.77      | 0.76       | 0.7646    |
| 555      | 0.76      | 0.76       | 0.75835   |
| 556      | 0.75      | 0.75       | 0.74825   |
| 557      | 0.74      | 0.74       | 0.7369    |
| 558      | 0.73      | 0.73       | 0.7279    |
| 559      | 0.71      | 0.71       | 0.7062    |
| 560      | 0.71      | 0.71       | 0.7087    |
| 561      | 0.71      | 0.71       | 0.7097    |
| 562      | 0.72      | 0.72       | 0.7215    |
| 563      | 0.72      | 0.72       | 0.7275    |
| 564      | 0.73      | 0.73       | 0.7443    |
| 565      | 0.74      | 0.74       | 0.7588    |
| 566      | 0.74      | 0.74       | 0.7584    |
| 567      | 0.72      | 0.72       | 0.74815   |
| 568      | 0.7       | 0.7        | 0.7376    |
| 569      | 0.69      | 0.69       | 0.7333    |
| 570      | 0.67      | 0.67       | 0.7203    |
| 571      | 0.63      | 0.63       | 0.70145   |
| 572      | 0.59      | 0.59       | 0.68295   |
| 573      | 0.55      | 0.55       | 0.65955   |
| 574      | 0.51      | 0.51       | 0.6319    |
| 575      | 0.45      | 0.45       | 0.59725   |
| 576      | 0.38      | 0.38       | 0.56495   |
| 577      | 0.32      | 0.32       | 0.5578    |
| 578      | 0.28      | 0.28       | 0.5633    |
| 579      | 0.28      | 0.28       | 0.5906    |
