# Supplementary material for: Cefiderocol susceptibility endows hope in treating carbapenem-resistant Pseudomonas aeruginosa : insights from in vitro and in silico evidence
Source: Royal Society of Chemistry journal article supplement (doi:10.1039/d4ra04302b), 2024-01-01
Supplement: d4ra04302b2.pdf [file d4ra04302b2.pdf]

Supplementary File-S2(a) [Accessibility free energies  $\Delta G$  in kcal/mol]

| Seq | PBP3      | PBP3_F533L | PBP3_T91A |
|-----|-----------|------------|-----------|
| 56  | 1.146015  | 1.146015   | 1.146015  |
| 57  | 1.716206  | 1.716206   | 1.716206  |
| 58  | 1.340219  | 1.340219   | 1.340219  |
| 59  | 1.324414  | 1.324414   | 1.324414  |
| 60  | 1.512021  | 1.512021   | 1.512021  |
| 61  | 1.621169  | 1.621169   | 1.621169  |
| 62  | 6.569576  | 6.569576   | 6.569576  |
| 63  | 1.47127   | 1.47127    | 1.47127   |
| 64  | 3.294618  | 3.294618   | 3.294618  |
| 65  | -1.935692 | -1.935692  | -1.935692 |
| 66  | 0.797952  | 0.797952   | 0.797952  |
| 67  | 3.139911  | 3.139911   | 3.139911  |
| 68  | 1.599801  | 1.599801   | 1.599801  |
| 69  | -1.63535  | -1.63535   | -1.63535  |
| 70  | 0.188971  | 0.188971   | 0.188971  |
| 71  | -0.658459 | -0.658459  | -0.658459 |
| 72  | 0.227551  | 0.227551   | 0.227551  |
| 73  | -1.310418 | -1.310418  | -1.310418 |
| 74  | -1.095262 | -1.095262  | -1.095262 |
| 75  | 1.002632  | 1.002632   | 1.002632  |
| 76  | 0.269702  | 0.269702   | 0.269702  |
| 77  | -0.646463 | -0.646463  | -0.646463 |
| 78  | -0.581359 | -0.581359  | -0.581359 |
| 79  | -0.992194 | -0.992194  | -0.992194 |
| 80  | 0.580093  | 0.580093   | 0.580093  |
| 81  | -0.33668  | -0.33668   | -0.33668  |
| 82  | -2.129507 | -2.129507  | -2.129507 |
| 83  | -0.676509 | -0.676509  | -0.676509 |
| 84  | 0.843365  | 0.843365   | 0.843365  |
| 85  | 3.618154  | 3.618154   | 3.618154  |
| 86  | 1.966527  | 1.966527   | 2.042191  |
| 87  | -1.378761 | -1.378761  | -1.287061 |
| 88  | 6.558066  | 6.558066   | 6.698696  |
| 89  | -0.758175 | -0.758175  | -1.201564 |
| 90  | 0.748845  | 0.748845   | 0.841143  |
| 91  | -1.196393 | -1.196393  | 0.961953  |
| 92  | -0.398562 | -0.398562  | -0.080888 |
| 93  | -1.332576 | -1.332576  | -0.907355 |
| 94  | -3.520883 | -3.520883  | -3.329582 |
| 95  | -1.384777 | -1.384777  | -1.024014 |
| 96  | -3.804405 | -3.804405  | -3.513698 |
| 97  | -1.562408 | -1.562408  | -1.562408 |
| 98  | -3.545879 | -3.545879  | -3.545879 |
| 99  | -4.111554 | -4.111554  | -4.111554 |

| Seq | PBP3      | PBP3_F533L | PBP3_T91A |
|-----|-----------|------------|-----------|
| 100 | -2.699846 | -2.699846  | -2.699846 |
| 101 | -1.198091 | -1.198091  | -1.198091 |
| 102 | -0.255124 | -0.255124  | -0.255124 |
| 103 | -1.581173 | -1.581173  | -1.581173 |
| 104 | -0.481768 | -0.481768  | -0.481768 |
| 105 | 0.719215  | 0.719215   | 0.719215  |
| 106 | -0.250965 | -0.250965  | -0.250965 |
| 107 | -0.101203 | -0.101203  | -0.101203 |
| 108 | -1.064347 | -1.064347  | -1.064347 |
| 109 | 0.564026  | 0.564026   | 0.564026  |
| 110 | -2.668821 | -2.668821  | -2.668821 |
| 111 | -0.297453 | -0.297453  | -0.297453 |
| 112 | -1.653277 | -1.653277  | -1.653277 |
| 113 | -1.329807 | -1.329807  | -1.329807 |
| 114 | -3.298323 | -3.298323  | -3.298323 |
| 115 | -1.778936 | -1.778936  | -1.778936 |
| 116 | -2.037228 | -2.037228  | -2.037228 |
| 117 | 0.61381   | 0.61381    | 0.61381   |
| 118 | -0.068265 | -0.068265  | -0.068265 |
| 119 | -1.873526 | -1.873526  | -1.873526 |
| 120 | -1.279149 | -1.279149  | -1.279149 |
| 121 | -0.377388 | -0.377388  | -0.377388 |
| 122 | 2.447488  | 2.447488   | 2.447488  |
| 123 | -0.342765 | -0.342765  | -0.342765 |
| 124 | 0.505863  | 0.505863   | 0.505863  |
| 125 | -2.314736 | -2.314736  | -2.314736 |
| 126 | 0.115716  | 0.115716   | 0.115716  |
| 127 | -0.350948 | -0.350948  | -0.350948 |
| 128 | -0.149962 | -0.149962  | -0.149962 |
| 129 | -1.82766  | -1.82766   | -1.82766  |
| 130 | -1.815132 | -1.815132  | -1.815132 |
| 131 | -0.652074 | -0.652074  | -0.652074 |
| 132 | -3.553808 | -3.553808  | -3.553808 |
| 133 | -1.360522 | -1.360522  | -1.360522 |
| 134 | -0.375949 | -0.375949  | -0.375949 |
| 135 | -2.459231 | -2.459231  | -2.459231 |
| 136 | -0.425335 | -0.425335  | -0.425335 |
| 137 | -1.723825 | -1.723825  | -1.723825 |
| 138 | 1.767483  | 1.767483   | 1.767483  |
| 139 | 2.518415  | 2.518415   | 2.518415  |
| 140 | 1.048134  | 1.048134   | 1.048134  |
| 141 | -0.777431 | -0.777431  | -0.777431 |
| 142 | -0.406945 | -0.406945  | -0.406945 |
| 143 | -0.085438 | -0.085438  | -0.085438 |

Contd..S2(a)

| Seq | PBP3      | PBP3_F533L | PBP3_T91A |
|-----|-----------|------------|-----------|
| 144 | 0.615646  | 0.615646   | 0.615646  |
| 145 | -0.543595 | -0.543595  | -0.543595 |
| 146 | -1.502745 | -1.502745  | -1.502745 |
| 147 | -0.989522 | -0.989522  | -0.989522 |
| 148 | -0.683402 | -0.683402  | -0.683402 |
| 149 | -0.804952 | -0.804952  | -0.804952 |
| 150 | 3.178347  | 3.178347   | 3.178347  |
| 151 | -2.697971 | -2.697971  | -2.697971 |
| 152 | 0.329607  | 0.329607   | 0.329607  |
| 153 | 6.957231  | 6.957231   | 6.957231  |
| 154 | 3.961131  | 3.961131   | 3.961131  |
| 155 | 0.87634   | 0.87634    | 0.87634   |
| 156 | -0.108906 | -0.108906  | -0.108906 |
| 157 | 1.200491  | 1.200491   | 1.200491  |
| 158 | 1.308977  | 1.308977   | 1.308977  |
| 159 | -0.627359 | -0.627359  | -0.627359 |
| 160 | -1.006519 | -1.006519  | -1.006519 |
| 161 | -3.381737 | -3.381737  | -3.381737 |
| 162 | -2.764305 | -2.764305  | -2.764305 |
| 163 | -0.015619 | -0.015619  | -0.015619 |
| 164 | -2.831617 | -2.831617  | -2.831617 |
| 165 | -1.472949 | -1.472949  | -1.472949 |
| 166 | -0.70914  | -0.70914   | -0.70914  |
| 167 | -1.075932 | -1.075932  | -1.075932 |
| 168 | 1.030558  | 1.030558   | 1.030558  |
| 169 | 0.434393  | 0.434393   | 0.434393  |
| 170 | 4.27245   | 4.27245    | 4.27245   |
| 171 | -0.082357 | -0.082357  | -0.082357 |
| 172 | 2.238255  | 2.238255   | 2.238255  |
| 173 | -0.128867 | -0.128867  | -0.128867 |
| 174 | 0.478106  | 0.478106   | 0.478106  |
| 175 | -0.637161 | -0.637161  | -0.637161 |
| 176 | 1.748066  | 1.748066   | 1.748066  |
| 177 | 0.085963  | 0.085963   | 0.085963  |
| 178 | -1.490125 | -1.490125  | -1.490125 |
| 179 | 5.245556  | 5.245556   | 5.245556  |
| 180 | 1.29731   | 1.29731    | 1.29731   |
| 181 | 1.104374  | 1.104374   | 1.104374  |
| 182 | -0.158033 | -0.158033  | -0.158033 |
| 183 | 1.008807  | 1.008807   | 1.008807  |
| 184 | -0.70399  | -0.70399   | -0.70399  |
| 185 | 2.339601  | 2.339601   | 2.339601  |
| 186 | -2.115039 | -2.115039  | -2.115039 |

| Seq | PBP3      | PBP3_F533L | PBP3_T91A |
|-----|-----------|------------|-----------|
| 187 | 1.418287  | 1.418287   | 1.418287  |
| 188 | 0.866048  | 0.866048   | 0.866048  |
| 189 | 1.452258  | 1.452258   | 1.452258  |
| 190 | -0.22447  | -0.22447   | -0.22447  |
| 191 | 2.109095  | 2.109095   | 2.109095  |
| 192 | -0.097566 | -0.097566  | -0.097566 |
| 193 | 0.279921  | 0.279921   | 0.279921  |
| 194 | -0.592112 | -0.592112  | -0.592112 |
| 195 | 0.202253  | 0.202253   | 0.202253  |
| 196 | 1.62728   | 1.62728    | 1.62728   |
| 197 | -0.643363 | -0.643363  | -0.643363 |
| 198 | 1.274366  | 1.274366   | 1.274366  |
| 199 | -0.103001 | -0.103001  | -0.103001 |
| 200 | -1.281396 | -1.281396  | -1.281396 |
| 201 | 0.386452  | 0.386452   | 0.386452  |
| 202 | -0.165578 | -0.165578  | -0.165578 |
| 203 | 1.3148    | 1.3148     | 1.3148    |
| 204 | -1.178535 | -1.178535  | -1.178535 |
| 205 | -0.923406 | -0.923406  | -0.923406 |
| 206 | -0.396189 | -0.396189  | -0.396189 |
| 207 | 1.711319  | 1.711319   | 1.711319  |
| 208 | -0.737927 | -0.737927  | -0.737927 |
| 209 | 1.170201  | 1.170201   | 1.170201  |
| 210 | -0.471486 | -0.471486  | -0.471486 |
| 211 | -0.69264  | -0.69264   | -0.69264  |
| 212 | -1.497769 | -1.497769  | -1.497769 |
| 213 | -0.143726 | -0.143726  | -0.143726 |
| 214 | -1.675431 | -1.675431  | -1.675431 |
| 215 | -0.944399 | -0.944399  | -0.944399 |
| 216 | 0.222303  | 0.222303   | 0.222303  |
| 217 | -0.90953  | -0.90953   | -0.90953  |
| 218 | 0.554246  | 0.554246   | 0.554246  |
| 219 | -2.707878 | -2.707878  | -2.707878 |
| 220 | 0.345665  | 0.345665   | 0.345665  |
| 221 | -2.288329 | -2.288329  | -2.288329 |
| 222 | 0.071353  | 0.071353   | 0.071353  |
| 223 | -1.436886 | -1.436886  | -1.436886 |
| 224 | 0.410045  | 0.410045   | 0.410045  |
| 225 | -1.201619 | -1.201619  | -1.201619 |
| 226 | -0.87412  | -0.87412   | -0.87412  |
| 227 | -1.175383 | -1.175383  | -1.175383 |
| 228 | 3.180235  | 3.180235   | 3.180235  |
| 229 | 2.384323  | 2.384323   | 2.384323  |

Contd..S2(a)

| Seq | PBP3      | PBP3_F533L | PBP3_T91A |
|-----|-----------|------------|-----------|
| 230 | 0.879668  | 0.879668   | 0.879668  |
| 231 | -1.154434 | -1.154434  | -1.154434 |
| 232 | 2.15144   | 2.15144    | 2.15144   |
| 233 | -0.733153 | -0.733153  | -0.733153 |
| 234 | 4.886321  | 4.886321   | 4.886321  |
| 235 | -2.503847 | -2.503847  | -2.503847 |
| 236 | -1.293792 | -1.293792  | -1.293792 |
| 237 | -1.153525 | -1.153525  | -1.153525 |
| 238 | -0.743952 | -0.743952  | -0.743952 |
| 239 | -2.822037 | -2.822037  | -2.822037 |
| 240 | 2.606012  | 2.606012   | 2.606012  |
| 241 | -2.595512 | -2.595512  | -2.595512 |
| 242 | 0.97941   | 0.97941    | 0.97941   |
| 243 | 1.122141  | 1.122141   | 1.122141  |
| 244 | -0.111074 | -0.111074  | -0.111074 |
| 245 | -1.511627 | -1.511627  | -1.511627 |
| 246 | -0.426553 | -0.426553  | -0.426553 |
| 247 | -0.692555 | -0.692555  | -0.692555 |
| 248 | -0.530614 | -0.530614  | -0.530614 |
| 249 | -2.423796 | -2.423796  | -2.423796 |
| 250 | -2.821062 | -2.821062  | -2.821062 |
| 251 | -2.768331 | -2.768331  | -2.768331 |
| 252 | -2.533674 | -2.533674  | -2.533674 |
| 253 | 1.032361  | 1.032361   | 1.032361  |
| 254 | -0.872555 | -0.872555  | -0.872555 |
| 255 | -1.357931 | -1.357931  | -1.357931 |
| 256 | 0.472757  | 0.472757   | 0.472757  |
| 257 | -0.193366 | -0.193366  | -0.193366 |
| 258 | 4.586996  | 4.586996   | 4.586996  |
| 259 | -1.688269 | -1.688269  | -1.688269 |
| 260 | -1.355921 | -1.355921  | -1.355921 |
| 261 | 0.00438   | 0.00438    | 0.00438   |
| 262 | 0.014057  | 0.014057   | 0.014057  |
| 263 | 2.139411  | 2.139411   | 2.139411  |
| 264 | 3.037076  | 3.037076   | 3.037076  |
| 265 | 5.479735  | 5.479735   | 5.479735  |
| 266 | 1.382675  | 1.382675   | 1.382675  |
| 267 | 2.087853  | 2.087853   | 2.087853  |
| 268 | 0.158721  | 0.158721   | 0.158721  |
| 269 | 0.155931  | 0.155931   | 0.155931  |
| 270 | 2.643744  | 2.643744   | 2.643744  |
| 271 | 0.026482  | 0.026482   | 0.026482  |
| 272 | 0.05379   | 0.05379    | 0.05379   |

| Seq | PBP3      | PBP3_F533L | PBP3_T91A |
|-----|-----------|------------|-----------|
| 273 | -0.647569 | -0.647569  | -0.647569 |
| 274 | -0.620969 | -0.620969  | -0.620969 |
| 275 | -0.096391 | -0.096391  | -0.096391 |
| 276 | 2.513663  | 2.513663   | 2.513663  |
| 277 | 0.506281  | 0.506281   | 0.506281  |
| 278 | -0.311796 | -0.311796  | -0.311796 |
| 279 | 1.569131  | 1.569131   | 1.569131  |
| 280 | 0.545548  | 0.545548   | 0.545548  |
| 281 | 1.498359  | 1.498359   | 1.498359  |
| 282 | -0.289106 | -0.289106  | -0.289106 |
| 283 | 1.793152  | 1.793152   | 1.793152  |
| 284 | 5.661725  | 5.661725   | 5.661725  |
| 285 | -0.492214 | -0.492214  | -0.492214 |
| 286 | -0.879741 | -0.879741  | -0.879741 |
| 287 | 1.778866  | 1.778866   | 1.778866  |
| 288 | 2.614555  | 2.614555   | 2.614555  |
| 289 | 0.603159  | 0.603159   | 0.603159  |
| 290 | -0.806063 | -0.806063  | -0.806063 |
| 291 | 0.780793  | 0.780793   | 0.780793  |
| 292 | 3.92196   | 3.92196    | 3.92196   |
| 293 | 3.131318  | 3.131318   | 3.131318  |
| 294 | 1.446403  | 1.446403   | 1.446403  |
| 295 | 2.934024  | 2.934024   | 2.934024  |
| 296 | 0.245799  | 0.245799   | 0.245799  |
| 297 | 7.617965  | 7.617965   | 7.617965  |
| 298 | 1.89391   | 1.89391    | 1.89391   |
| 299 | 0.196593  | 0.196593   | 0.196593  |
| 300 | 1.607726  | 1.607726   | 1.607726  |
| 301 | 0.152953  | 0.152953   | 0.152953  |
| 302 | 2.160479  | 2.160479   | 2.160479  |
| 303 | -0.724818 | -0.724818  | -0.724818 |
| 304 | -1.564191 | -1.564191  | -1.564191 |
| 305 | -0.511441 | -0.511441  | -0.511441 |
| 306 | 0.655138  | 0.655138   | 0.655138  |
| 307 | 0.321759  | 0.321759   | 0.321759  |
| 308 | -0.311426 | -0.311426  | -0.311426 |
| 309 | -0.859236 | -0.859236  | -0.859236 |
| 310 | -1.375047 | -1.375047  | -1.375047 |
| 311 | 0.596056  | 0.596056   | 0.596056  |
| 312 | 0.447164  | 0.447164   | 0.447164  |
| 313 | -1.218968 | -1.218968  | -1.218968 |
| 314 | 0.227607  | 0.227607   | 0.227607  |
| 315 | 1.556229  | 1.556229   | 1.556229  |

Contd..S2(a)

| Seq | PBP3      | PBP3_F533L | PBP3_T91A |
|-----|-----------|------------|-----------|
| 316 | -0.805993 | -0.805993  | -0.805993 |
| 317 | -0.676387 | -0.676387  | -0.676387 |
| 318 | -0.607369 | -0.607369  | -0.607369 |
| 319 | 1.508134  | 1.508134   | 1.508134  |
| 320 | -0.887369 | -0.887369  | -0.887369 |
| 321 | 1.185467  | 1.185467   | 1.185467  |
| 322 | -0.182701 | -0.182701  | -0.182701 |
| 323 | 0.248877  | 0.248877   | 0.248877  |
| 324 | -0.250225 | -0.250225  | -0.250225 |
| 325 | -0.718274 | -0.718274  | -0.718274 |
| 326 | 1.607007  | 1.607007   | 1.607007  |
| 327 | 0.30874   | 0.30874    | 0.30874   |
| 328 | 3.559537  | 3.559537   | 3.559537  |
| 329 | 0.679834  | 0.679834   | 0.679834  |
| 330 | -0.341679 | -0.341679  | -0.341679 |
| 331 | 0.736044  | 0.736044   | 0.736044  |
| 332 | 4.049217  | 4.049217   | 4.049217  |
| 333 | 4.990831  | 4.990831   | 4.990831  |
| 334 | 0.301048  | 0.301048   | 0.301048  |
| 335 | -0.957947 | -0.957947  | -0.957947 |
| 336 | -0.082666 | -0.082666  | -0.082666 |
| 337 | 0.162684  | 0.162684   | 0.162684  |
| 338 | -1.006248 | -1.006248  | -1.006248 |
| 339 | -0.527314 | -0.527314  | -0.527314 |
| 340 | -1.191261 | -1.191261  | -1.191261 |
| 341 | -1.187295 | -1.187295  | -1.187295 |
| 342 | -1.549111 | -1.549111  | -1.549111 |
| 343 | 0.067536  | 0.067536   | 0.067536  |
| 344 | 0.558927  | 0.558927   | 0.558927  |
| 345 | -1.158663 | -1.158663  | -1.158663 |
| 346 | -2.528185 | -2.528185  | -2.528185 |
| 347 | 0.957653  | 0.957653   | 0.957653  |
| 348 | 0.56852   | 0.56852    | 0.56852   |
| 349 | 0.293274  | 0.293274   | 0.293274  |
| 350 | 1.094544  | 1.094544   | 1.094544  |
| 351 | 1.260048  | 1.260048   | 1.260048  |
| 352 | 0.406687  | 0.406687   | 0.406687  |
| 353 | -0.101257 | -0.101257  | -0.101257 |
| 354 | -1.193022 | -1.193022  | -1.193022 |
| 355 | -0.117257 | -0.117257  | -0.117257 |
| 356 | -0.347727 | -0.347727  | -0.347727 |
| 357 | -2.137066 | -2.137066  | -2.137066 |
| 358 | -2.510598 | -2.510598  | -2.510598 |
| 359 | 1.507468  | 1.507468   | 1.507468  |
| 360 | -0.784075 | -0.784075  | -0.784075 |

| Seq | PBP3      | PBP3_F533L | PBP3_T91A |
|-----|-----------|------------|-----------|
| 361 | -1.069532 | -1.069532  | -1.069532 |
| 362 | -0.679258 | -0.679258  | -0.679258 |
| 363 | -1.086067 | -1.086067  | -1.086067 |
| 364 | -2.435195 | -2.435195  | -2.435195 |
| 365 | -1.868043 | -1.868043  | -1.868043 |
| 366 | -3.266651 | -3.266651  | -3.266651 |
| 367 | -1.156552 | -1.156552  | -1.156552 |
| 368 | -2.467118 | -2.467118  | -2.467118 |
| 369 | -3.174608 | -3.174608  | -3.174608 |
| 370 | -2.456599 | -2.456599  | -2.456599 |
| 371 | -0.58609  | -0.58609   | -0.58609  |
| 372 | -0.420455 | -0.420455  | -0.420455 |
| 373 | -1.28516  | -1.28516   | -1.28516  |
| 374 | 0.151724  | 0.151724   | 0.151724  |
| 375 | -0.615136 | -0.615136  | -0.615136 |
| 376 | 0.182398  | 0.182398   | 0.182398  |
| 377 | -0.304179 | -0.304179  | -0.304179 |
| 378 | -1.008216 | -1.008216  | -1.008216 |
| 379 | 0.339773  | 0.339773   | 0.339773  |
| 380 | -0.592071 | -0.592071  | -0.592071 |
| 381 | -0.664641 | -0.664641  | -0.664641 |
| 382 | -0.232741 | -0.232741  | -0.232741 |
| 383 | 0.279281  | 0.279281   | 0.279281  |
| 384 | 1.152472  | 1.152472   | 1.152472  |
| 385 | 0.526899  | 0.526899   | 0.526899  |
| 386 | 1.572394  | 1.572394   | 1.572394  |
| 387 | -0.788948 | -0.788948  | -0.788948 |
| 388 | 1.867535  | 1.867535   | 1.867535  |
| 389 | 0.316342  | 0.316342   | 0.316342  |
| 390 | -1.605623 | -1.605623  | -1.605623 |
| 391 | -2.903499 | -2.903499  | -2.903499 |
| 392 | -1.204608 | -1.204608  | -1.204608 |
| 393 | -3.142532 | -3.142532  | -3.142532 |
| 394 | -2.027052 | -2.027052  | -2.027052 |
| 395 | -1.914615 | -1.914615  | -1.914615 |
| 396 | -2.668718 | -2.668718  | -2.668718 |
| 397 | -3.399643 | -3.399643  | -3.399643 |
| 398 | -0.441653 | -0.441653  | -0.441653 |
| 399 | -1.805489 | -1.805489  | -1.805489 |
| 400 | 0.143966  | 0.143966   | 0.143966  |
| 401 | -0.749825 | -0.749825  | -0.749825 |
| 402 | 0.896839  | 0.896839   | 0.896839  |
| 403 | -2.074774 | -2.074774  | -2.074774 |

Contd..S2(a)

| Seq | PBP3      | PBP3_F533L | PBP3_T91A |
|-----|-----------|------------|-----------|
| 404 | 0.090013  | 0.090013   | 0.090013  |
| 405 | -1.92079  | -1.92079   | -1.92079  |
| 406 | -1.930926 | -1.930926  | -1.930926 |
| 407 | 0.049875  | 0.049875   | 0.049875  |
| 408 | -1.189591 | -1.189591  | -1.189591 |
| 409 | 0.513652  | 0.513652   | 0.513652  |
| 410 | -0.557077 | -0.557077  | -0.557077 |
| 411 | -1.952406 | -1.952406  | -1.952406 |
| 412 | -0.378954 | -0.378954  | -0.378954 |
| 413 | -2.18193  | -2.18193   | -2.18193  |
| 414 | -0.11184  | -0.11184   | -0.11184  |
| 415 | -2.915825 | -2.915825  | -2.915825 |
| 416 | -2.081966 | -2.081966  | -2.081966 |
| 417 | 1.781197  | 1.781197   | 1.781197  |
| 418 | -2.69853  | -2.69853   | -2.69853  |
| 419 | -2.545034 | -2.545034  | -2.545034 |
| 420 | -1.311591 | -1.311591  | -1.311591 |
| 421 | -2.621297 | -2.621297  | -2.621297 |
| 422 | -1.181392 | -1.181392  | -1.181392 |
| 423 | -2.405888 | -2.405888  | -2.405888 |
| 424 | -2.591359 | -2.591359  | -2.591359 |
| 425 | -2.99758  | -2.99758   | -2.99758  |
| 426 | -1.517152 | -1.517152  | -1.517152 |
| 427 | 0.943461  | 0.943461   | 0.943461  |
| 428 | -0.697895 | -0.697895  | -0.697895 |
| 429 | 0.790198  | 0.790198   | 0.790198  |
| 430 | 0.180727  | 0.180727   | 0.180727  |
| 431 | 0.609929  | 0.609929   | 0.609929  |
| 432 | -1.216734 | -1.216734  | -1.216734 |
| 433 | -0.052423 | -0.052423  | -0.052423 |
| 434 | 0.219124  | 0.219124   | 0.219124  |
| 435 | 0.089651  | 0.089651   | 0.089651  |
| 436 | -1.181593 | -1.181593  | -1.181593 |
| 437 | 0.021755  | 0.021755   | 0.021755  |
| 438 | -0.505735 | -0.505735  | -0.505735 |
| 439 | -0.031025 | -0.031025  | -0.031025 |
| 440 | -0.12972  | -0.12972   | -0.12972  |
| 441 | -0.351736 | -0.351736  | -0.351736 |
| 442 | 1.750052  | 1.750052   | 1.750052  |
| 443 | 0.095691  | 0.095691   | 0.095691  |
| 444 | -3.227591 | -3.227591  | -3.227591 |
| 445 | -0.387515 | -0.387515  | -0.387515 |
| 446 | 3.308236  | 3.308236   | 3.308236  |

| Seq | PBP3      | PBP3_F533L | PBP3_T91A |
|-----|-----------|------------|-----------|
| 447 | -0.449353 | -0.449353  | -0.449353 |
| 448 | -2.098842 | -2.098842  | -2.098842 |
| 449 | -2.334728 | -2.334728  | -2.334728 |
| 450 | -0.8619   | -0.8619    | -0.8619   |
| 451 | -0.586824 | -0.586824  | -0.586824 |
| 452 | -3.734679 | -3.734679  | -3.734679 |
| 453 | -1.984767 | -1.984767  | -1.984767 |
| 454 | -1.609936 | -1.609936  | -1.609936 |
| 455 | -1.001107 | -1.001107  | -1.001107 |
| 456 | -1.628775 | -1.628775  | -1.628775 |
| 457 | -3.103479 | -3.103479  | -3.103479 |
| 458 | 1.312983  | 1.312983   | 1.312983  |
| 459 | -0.010876 | -0.010876  | -0.010876 |
| 460 | -1.220271 | -1.220271  | -1.220271 |
| 461 | -2.616652 | -2.616652  | -2.616652 |
| 462 | 1.576136  | 1.576136   | 1.576136  |
| 463 | -0.875806 | -0.875806  | -0.875806 |
| 464 | -3.216551 | -3.216551  | -3.216551 |
| 465 | -3.324631 | -3.324631  | -3.324631 |
| 466 | -1.627107 | -1.627107  | -1.627107 |
| 467 | 0.706597  | 0.706597   | 0.706597  |
| 468 | -1.732436 | -1.732436  | -1.732436 |
| 469 | -1.260171 | -1.260171  | -1.260171 |
| 470 | -0.157124 | -0.157124  | -0.157124 |
| 471 | -0.083875 | -0.083875  | -0.083875 |
| 472 | 5.05142   | 5.05142    | 5.05142   |
| 473 | -1.107564 | -1.107564  | -1.107564 |
| 474 | -1.21756  | -1.21756   | -1.21756  |
| 475 | 0.033039  | 0.033039   | 0.033039  |
| 476 | -1.523049 | -1.523049  | -1.523049 |
| 477 | -1.042726 | -1.042726  | -1.042726 |
| 478 | -0.39086  | -0.39086   | -0.39086  |
| 479 | 0.283079  | 0.283079   | 0.283079  |
| 480 | -0.096559 | -0.096559  | -0.096559 |
| 481 | -0.984676 | -0.984676  | -0.984676 |
| 482 | -0.857818 | -0.857818  | -0.857818 |
| 483 | -0.115338 | -0.115338  | -0.115338 |
| 484 | 7.300702  | 7.300702   | 7.300702  |
| 485 | 1.018792  | 1.018792   | 1.018792  |
| 486 | 1.766307  | 1.766307   | 1.766307  |
| 487 | 1.046336  | 1.046336   | 1.046336  |
| 488 | 0.113636  | 0.113636   | 0.113636  |
| 489 | 1.303297  | 1.303297   | 1.303297  |

Contd..S2(a)

| Seq | PBP3      | PBP3_F533L | PBP3_T91A |
|-----|-----------|------------|-----------|
| 490 | 1.238167  | 1.238167   | 1.238167  |
| 491 | 2.424333  | 2.424333   | 2.424333  |
| 492 | 0.391737  | 0.391737   | 0.391737  |
| 493 | 3.123603  | 3.123603   | 3.123603  |
| 494 | 0.739914  | 0.739914   | 0.739914  |
| 495 | 1.240828  | 1.240828   | 1.240828  |
| 496 | -0.455113 | -0.455113  | -0.455113 |
| 497 | 1.069904  | 1.069904   | 1.069904  |
| 498 | 3.467078  | 3.467078   | 3.467078  |
| 499 | 1.331245  | 1.331245   | 1.331245  |
| 500 | 0.030314  | 0.030314   | 0.030314  |
| 501 | 0.182503  | 0.182503   | 0.182503  |
| 502 | 0.97899   | 0.97899    | 0.97899   |
| 503 | 0.026745  | 0.026745   | 0.026745  |
| 504 | 4.333886  | 4.333886   | 4.333886  |
| 505 | -0.181729 | -0.181729  | -0.181729 |
| 506 | -2.167836 | -2.167836  | -2.167836 |
| 507 | -1.271299 | -1.271299  | -1.271299 |
| 508 | -0.323322 | -0.323322  | -0.323322 |
| 509 | 0.203887  | 0.203887   | 0.203887  |
| 510 | -1.418102 | -1.418102  | -1.418102 |
| 511 | -1.472374 | -1.472374  | -1.472374 |
| 512 | 2.376419  | 2.376419   | 2.376419  |
| 513 | 0.226353  | 0.226353   | 0.226353  |
| 514 | 0.004115  | 0.004115   | 0.004115  |
| 515 | -0.595485 | -0.595485  | -0.595485 |
| 516 | -0.137127 | -0.137127  | -0.137127 |
| 517 | -1.150107 | -1.150107  | -1.150107 |
| 518 | -2.788643 | -2.788643  | -2.788643 |
| 519 | -3.264735 | -3.264735  | -3.264735 |
| 520 | -3.839326 | -3.839326  | -3.839326 |
| 521 | -3.78019  | -3.78019   | -3.78019  |
| 522 | -3.505256 | -3.505256  | -3.505256 |
| 523 | -3.630981 | -3.630981  | -3.630981 |
| 524 | -3.863052 | -3.863052  | -3.863052 |
| 525 | -0.637721 | -0.637721  | -0.637721 |
| 526 | 0.291718  | 0.291718   | 0.291718  |
| 527 | 0.129421  | 0.129421   | 0.129421  |
| 528 | 0.159589  | 0.159589   | 0.159589  |
| 529 | -0.686152 | -0.686152  | -0.686152 |
| 530 | 1.619334  | 1.619334   | 1.619334  |
| 531 | 1.403496  | 1.403496   | 1.403496  |
| 532 | 3.285823  | 3.285823   | 3.285823  |

| Seq | PBP3      | PBP3_F533L | PBP3_T91A |
|-----|-----------|------------|-----------|
| 533 | 3.291267  | 3.291267   | 3.291267  |
| 534 | 2.206395  | 2.206395   | 2.206395  |
| 535 | 1.182654  | 1.182654   | 1.182654  |
| 536 | 3.202104  | 3.202104   | 3.202104  |
| 537 | -0.566603 | -0.566603  | -0.566603 |
| 538 | 1.748898  | 1.748898   | 1.748898  |
| 539 | -1.652708 | -1.652708  | -1.652708 |
| 540 | 0.063749  | 0.063749   | 0.063749  |
| 541 | -0.196846 | -0.196846  | -0.196846 |
| 542 | -1.978598 | -1.978598  | -1.978598 |
| 543 | 0.024499  | 0.024499   | 0.024499  |
| 544 | -1.2039   | -1.2039    | -1.2039   |
| 545 | -1.985596 | -1.985596  | -1.985596 |
| 546 | -2.095456 | -2.095456  | -2.095456 |
| 547 | 0.108554  | 0.108554   | 0.108554  |
| 548 | 0.619723  | 0.619723   | 0.619723  |
| 549 | -2.481637 | -2.481637  | -2.481637 |
| 550 | -2.29336  | -2.29336   | -2.29336  |
| 551 | -1.113306 | -1.113306  | -1.113306 |
| 552 | 0.573552  | 0.573552   | 0.573552  |
| 553 | -0.380251 | -0.380251  | -0.380251 |
| 554 | -2.666222 | -2.666222  | -2.666222 |
| 555 | -1.915395 | -1.915395  | -1.915395 |
| 556 | -0.188605 | -0.188605  | -0.188605 |
| 557 | -1.126937 | -1.126937  | -1.126937 |
| 558 | -0.305977 | -0.305977  | -0.305977 |
| 559 | -1.005388 | -1.005388  | -1.005388 |

Supplementary File-S2(b) [Torsion free energies  $\Delta G$  in kcal/mol]

| Seq | PBP3       | PBP3_F533L | PBP3_T91A  |
|-----|------------|------------|------------|
| 56  | 0          | 0          | 0          |
| 57  | 0.293422   | 0.293422   | 0.293422   |
| 58  | -0.363504  | -0.363504  | -0.363504  |
| 59  | -1.511173  | -1.511173  | -1.511173  |
| 60  | 2.670865   | 2.670865   | 2.670865   |
| 61  | 1.895884   | 1.895884   | 1.895884   |
| 62  | 1.896064   | 1.896064   | 1.896064   |
| 63  | 3.291504   | 3.291504   | 3.291504   |
| 64  | -1.192135  | -1.192135  | -1.192135  |
| 65  | -4.43541   | -4.43541   | -4.43541   |
| 66  | -3.788794  | -3.788794  | -3.788794  |
| 67  | -2.302059  | -2.302059  | -2.302059  |
| 68  | -2.038004  | -2.038004  | -2.038004  |
| 69  | -6.90691   | -6.90691   | -6.90691   |
| 70  | -14.654777 | -14.654777 | -14.654777 |
| 71  | -5.782951  | -5.782951  | -5.782951  |
| 72  | -8.036805  | -8.036805  | -8.036805  |
| 73  | -2.297054  | -2.297054  | -2.297054  |
| 74  | -4.251518  | -4.251518  | -4.251518  |
| 75  | -4.543692  | -4.543692  | -4.543692  |
| 76  | -3.522141  | -3.522141  | -3.522141  |
| 77  | -4.113986  | -4.113986  | -4.113986  |
| 78  | -5.869324  | -5.869324  | -5.869324  |
| 79  | -1.226989  | -1.226989  | -1.226989  |
| 80  | -2.001995  | -2.001995  | -2.001995  |
| 81  | -2.652523  | -2.652523  | -2.652523  |
| 82  | -2.324404  | -2.324404  | -2.324404  |
| 83  | -0.910238  | -0.910238  | -0.910238  |
| 84  | 0.977952   | 0.977952   | 0.365006   |
| 85  | 0.718284   | 0.718284   | 0.011662   |
| 86  | -1.06717   | -1.06717   | -2.567581  |
| 87  | -1.984073  | -1.984073  | -3.749864  |
| 88  | -0.326941  | -0.326941  | -2.532076  |
| 89  | -0.097581  | -0.097581  | -2.57094   |
| 90  | 3.972488   | 3.972488   | 4.174168   |
| 91  | 2.887499   | 2.887499   | -2.588532  |
| 92  | 2.449255   | 2.449255   | 1.043638   |
| 93  | -1.269727  | -1.269727  | -2.719347  |
| 94  | -1.418181  | -1.418181  | -2.781344  |
| 95  | -2.592655  | -2.592655  | -3.656937  |
| 96  | 0.221952   | 0.221952   | -0.376806  |
| 97  | -3.388958  | -3.388958  | -3.830377  |
| 98  | -3.908378  | -3.908378  | -4.35536   |
| 99  | -4.584574  | -4.584574  | -4.584574  |
| 100 | -4.759912  | -4.759912  | -4.759912  |

| Seq | PBP3     | PBP3_F533L | PBP3_T91A  |
|-----|----------|------------|------------|
| 101 | -4.67148 | -4.671482  | -4.671482  |
| 102 | -3.20269 | -3.202692  | -3.202692  |
| 103 | -4.52698 | -4.526982  | -4.526982  |
| 104 | -11.6257 | -11.625707 | -11.625707 |
| 105 | -0.34264 | -0.342639  | -0.342639  |
| 106 | -4.1216  | -4.121598  | -4.121598  |
| 107 | -1.18078 | -1.180784  | -1.180784  |
| 108 | -2.318   | -2.317998  | -2.317998  |
| 109 | -1.96046 | -1.960457  | -1.960457  |
| 110 | -2.22419 | -2.224193  | -2.224193  |
| 111 | -3.13857 | -3.138567  | -3.138567  |
| 112 | -1.37159 | -1.371585  | -1.371585  |
| 113 | -2.21567 | -2.215668  | -2.215668  |
| 114 | -2.45868 | -2.458676  | -2.458676  |
| 115 | -2.33142 | -2.331419  | -2.331419  |
| 116 | -0.69211 | -0.692109  | -0.692109  |
| 117 | -0.3877  | -0.387696  | -0.387696  |
| 118 | -1.86776 | -1.867758  | -1.867758  |
| 119 | 4.906344 | 4.906344   | 4.906344   |
| 120 | -0.74995 | -0.749946  | -0.749946  |
| 121 | 2.153675 | 2.153675   | 2.153675   |
| 122 | 0.922636 | 0.922636   | 0.922636   |
| 123 | -1.09051 | -1.09051   | -1.09051   |
| 124 | 3.901777 | 3.901777   | 3.901777   |
| 125 | 2.56028  | 2.56028    | 2.56028    |
| 126 | -1.14288 | -1.142882  | -1.142882  |
| 127 | 0.107442 | 0.107442   | 0.107442   |
| 128 | -9.23084 | -9.230836  | -9.230836  |
| 129 | -2.41169 | -2.411686  | -2.411686  |
| 130 | -4.94912 | -4.949117  | -4.949117  |
| 131 | 2.117627 | 2.117627   | 2.117627   |
| 132 | 1.49562  | 1.49562    | 1.49562    |
| 133 | 2.558592 | 2.558592   | 2.558592   |
| 134 | 2.715425 | 2.715425   | 2.715425   |
| 135 | 2.62029  | 2.62029    | 2.62029    |
| 136 | 3.663977 | 3.663977   | 3.663977   |
| 137 | 1.151655 | 1.151655   | 1.151655   |
| 138 | 0.010352 | 0.010352   | 0.010352   |
| 139 | 4.20195  | 4.20195    | 4.20195    |
| 140 | 0.750547 | 0.750547   | 0.750547   |
| 141 | 0.810096 | 0.810096   | 0.810096   |
| 142 | -1.78142 | -1.781419  | -1.781419  |
| 143 | -3.70382 | -3.703818  | -3.703818  |
| 144 | -8.46071 | -8.460706  | -8.460706  |
| 145 | -2.3592  | -2.359201  | -2.359201  |

Cond..S2(b)

| Seq | PBP3      | PBP3_F533L | PBP3_T91A |
|-----|-----------|------------|-----------|
| 146 | -2.035673 | -2.035673  | -2.035673 |
| 147 | -1.509545 | -1.509545  | -1.509545 |
| 148 | -0.905661 | -0.905661  | -0.905661 |
| 149 | 1.114384  | 1.114384   | 1.114384  |
| 150 | 0.819273  | 0.819273   | 0.819273  |
| 151 | -0.124719 | -0.124719  | -0.124719 |
| 152 | 0.313314  | 0.313314   | 0.313314  |
| 153 | 2.859043  | 2.859043   | 2.859043  |
| 154 | 0.260916  | 0.260916   | 0.260916  |
| 155 | -1.696911 | -1.696911  | -1.696911 |
| 156 | 1.844979  | 1.844979   | 1.844979  |
| 157 | -1.615697 | -1.615697  | -1.615697 |
| 158 | -9.867667 | -9.867667  | -9.867667 |
| 159 | 1.820998  | 1.820998   | 1.820998  |
| 160 | 1.093559  | 1.093559   | 1.093559  |
| 161 | 5.846147  | 5.846147   | 5.846147  |
| 162 | -0.379422 | -0.379422  | -0.379422 |
| 163 | 1.117725  | 1.117725   | 1.117725  |
| 164 | 1.285606  | 1.285606   | 1.285606  |
| 165 | 3.510038  | 3.510038   | 3.510038  |
| 166 | -8.840515 | -8.840515  | -8.840515 |
| 167 | -3.55226  | -3.55226   | -3.55226  |
| 168 | -3.707263 | -3.707263  | -3.707263 |
| 169 | -2.905668 | -2.905668  | -2.905668 |
| 170 | 0.685353  | 0.685353   | 0.685353  |
| 171 | -0.3516   | -0.3516    | -0.3516   |
| 172 | -2.322189 | -2.322189  | -2.322189 |
| 173 | 1.955721  | 1.955721   | 1.955721  |
| 174 | 1.23737   | 1.23737    | 1.23737   |
| 175 | 0.169139  | 0.169139   | 0.169139  |
| 176 | 3.401731  | 3.401731   | 3.401731  |
| 177 | -5.085718 | -5.085718  | -5.085718 |
| 178 | 0.474609  | 0.474609   | 0.474609  |
| 179 | -0.022751 | -0.022751  | -0.022751 |
| 180 | -0.457985 | -0.457985  | -0.457985 |
| 181 | -0.369638 | -0.369638  | -0.369638 |
| 182 | 1.403092  | 1.403092   | 1.403092  |
| 183 | -1.679268 | -1.679268  | -1.679268 |
| 184 | -2.091709 | -2.091709  | -2.091709 |
| 185 | -1.827616 | -1.827616  | -1.827616 |
| 186 | 0.206541  | 0.206541   | 0.206541  |
| 187 | 1.303492  | 1.303492   | 1.303492  |
| 188 | -5.409125 | -5.409125  | -5.409125 |

| Seq | PBP3     | PBP3_F533L | PBP3_T91A |
|-----|----------|------------|-----------|
| 189 | -2.57005 | -2.570052  | -2.570052 |
| 190 | -4.93566 | -4.935656  | -4.935656 |
| 191 | 3.643422 | 3.643422   | 3.643422  |
| 192 | 2.491628 | 2.491628   | 2.491628  |
| 193 | 2.241669 | 2.241669   | 2.241669  |
| 194 | 0.77705  | 0.77705    | 0.77705   |
| 195 | -0.02926 | -0.029257  | -0.029257 |
| 196 | 2.524508 | 2.524508   | 2.524508  |
| 197 | 4.516665 | 4.516665   | 4.516665  |
| 198 | 2.755667 | 2.755667   | 2.755667  |
| 199 | 5.89523  | 5.89523    | 5.89523   |
| 200 | 2.517799 | 2.517799   | 2.517799  |
| 201 | 5.240226 | 5.240226   | 5.240226  |
| 202 | 5.942558 | 5.942558   | 5.942558  |
| 203 | -0.09588 | -0.095882  | -0.095882 |
| 204 | 2.679395 | 2.679395   | 2.679395  |
| 205 | 0.571573 | 0.571573   | 0.571573  |
| 206 | 2.646434 | 2.646434   | 2.646434  |
| 207 | 2.971515 | 2.971515   | 2.971515  |
| 208 | 0.753103 | 0.753103   | 0.753103  |
| 209 | 2.033332 | 2.033332   | 2.033332  |
| 210 | 3.024214 | 3.024214   | 3.024214  |
| 211 | 0.809024 | 0.809024   | 0.809024  |
| 212 | 2.554152 | 2.554152   | 2.554152  |
| 213 | 0.759236 | 0.759236   | 0.759236  |
| 214 | 2.223676 | 2.223676   | 2.223676  |
| 215 | -3.7665  | -3.766496  | -3.766496 |
| 216 | 5.252286 | 5.252286   | 5.252286  |
| 217 | 2.75106  | 2.75106    | 2.75106   |
| 218 | 2.34301  | 2.34301    | 2.34301   |
| 219 | 2.217469 | 2.217469   | 2.217469  |
| 220 | 2.788354 | 2.788354   | 2.788354  |
| 221 | 4.214491 | 4.214491   | 4.214491  |
| 222 | 3.99573  | 3.99573    | 3.99573   |
| 223 | 6.579286 | 6.579286   | 6.579286  |
| 224 | 4.582259 | 4.582259   | 4.582259  |
| 225 | -1.1968  | -1.196803  | -1.196803 |
| 226 | -1.82666 | -1.826663  | -1.826663 |
| 227 | -2.14137 | -2.141367  | -2.141367 |
| 228 | -2.8175  | -2.817503  | -2.817503 |
| 229 | -2.88992 | -2.889924  | -2.889924 |
| 230 | -3.41444 | -3.414436  | -3.414436 |
| 231 | -3.81383 | -3.813829  | -3.813829 |



Cond..S2(b)

| Seq | PBP3       | PBP3_F533L | PBP3_T91A  |
|-----|------------|------------|------------|
| 232 | -4.311802  | -4.311802  | -4.311802  |
| 233 | -5.454129  | -5.454129  | -5.454129  |
| 234 | -5.183018  | -5.183018  | -5.183018  |
| 235 | -4.893414  | -4.893414  | -4.893414  |
| 236 | -5.602176  | -5.602176  | -5.602176  |
| 237 | -5.26886   | -5.26886   | -5.26886   |
| 238 | -5.810773  | -5.810773  | -5.810773  |
| 239 | -5.070414  | -5.070414  | -5.070414  |
| 240 | -5.661705  | -5.661705  | -5.661705  |
| 241 | -5.264555  | -5.264555  | -5.264555  |
| 242 | -7.019568  | -7.019568  | -7.019568  |
| 243 | -13.41582  | -13.41582  | -13.41582  |
| 244 | -5.330567  | -5.330567  | -5.330567  |
| 245 | -3.092288  | -3.092288  | -3.092288  |
| 246 | 0.096389   | 0.096389   | 0.096389   |
| 247 | -11.739236 | -11.739236 | -11.739236 |
| 248 | -2.470833  | -2.470833  | -2.470833  |
| 249 | -2.949042  | -2.949042  | -2.949042  |
| 250 | -5.232189  | -5.232189  | -5.232189  |
| 251 | -4.354406  | -4.354406  | -4.354406  |
| 252 | -4.444844  | -4.444844  | -4.444844  |
| 253 | -3.561208  | -3.561208  | -3.561208  |
| 254 | -0.739397  | -0.739397  | -0.739397  |
| 255 | -0.333182  | -0.333182  | -0.333182  |
| 256 | -3.267319  | -3.267319  | -3.267319  |
| 257 | -9.890112  | -9.890112  | -9.890112  |
| 258 | 0.509672   | 0.509672   | 0.509672   |
| 259 | 0.766979   | 0.766979   | 0.766979   |
| 260 | -1.119051  | -1.119051  | -1.119051  |
| 261 | -0.350461  | -0.350461  | -0.350461  |
| 262 | -1.275016  | -1.275016  | -1.275016  |
| 263 | -0.379856  | -0.379856  | -0.379856  |
| 264 | 0.679911   | 0.679911   | 0.679911   |
| 265 | -0.579445  | -0.579445  | -0.579445  |
| 266 | -12.407563 | -12.407563 | -12.407563 |
| 267 | -1.185687  | -1.185687  | -1.185687  |
| 268 | -2.137327  | -2.137327  | -2.137327  |
| 269 | -3.806262  | -3.806262  | -3.806262  |
| 270 | -1.702411  | -1.702411  | -1.702411  |
| 271 | -4.785132  | -4.785132  | -4.785132  |
| 272 | 1.585843   | 1.585843   | 1.585843   |
| 273 | -1.657536  | -1.657536  | -1.657536  |
| 274 | -0.792509  | -0.792509  | -0.792509  |
| 275 | 2.118265   | 2.118265   | 2.118265   |
| 276 | 2.616799   | 2.616799   | 2.616799   |

| Seq | PBP3     | PBP3_F533L | PBP3_T91A  |
|-----|----------|------------|------------|
| 277 | 1.020737 | 1.020737   | 1.020737   |
| 278 | -0.98232 | -0.982321  | -0.982321  |
| 279 | -2.44158 | -2.441581  | -2.441581  |
| 280 | -0.80196 | -0.801956  | -0.801956  |
| 281 | 2.462283 | 2.462283   | 2.462283   |
| 282 | 3.781559 | 3.781559   | 3.781559   |
| 283 | 2.462508 | 2.462508   | 2.462508   |
| 284 | -0.96896 | -0.968964  | -0.968964  |
| 285 | -0.16933 | -0.16933   | -0.16933   |
| 286 | 1.260928 | 1.260928   | 1.260928   |
| 287 | 4.361692 | 4.361692   | 4.361692   |
| 288 | -0.97534 | -0.975339  | -0.975339  |
| 289 | -1.72376 | -1.723761  | -1.723761  |
| 290 | -1.11329 | -1.11329   | -1.11329   |
| 291 | -1.92721 | -1.927209  | -1.927209  |
| 292 | -2.11893 | -2.118933  | -2.118933  |
| 293 | -8.72058 | -8.720575  | -8.720575  |
| 294 | -3.70009 | -3.700088  | -3.700088  |
| 295 | -2.70791 | -2.70791   | -2.70791   |
| 296 | 0.961832 | 0.961832   | 0.961832   |
| 297 | 3.198919 | 3.198919   | 3.198919   |
| 298 | 0.490721 | 0.490721   | 0.490721   |
| 299 | -0.23917 | -0.239168  | -0.239168  |
| 300 | 0.277592 | 0.277592   | 0.277592   |
| 301 | -1.46489 | -1.464887  | -1.464887  |
| 302 | -1.30919 | -1.309185  | -1.309185  |
| 303 | -1.9984  | -1.998395  | -1.998395  |
| 304 | -2.54552 | -2.54552   | -2.54552   |
| 305 | -3.08271 | -3.082712  | -3.082712  |
| 306 | -2.11833 | -2.118331  | -2.118331  |
| 307 | -6.23819 | -6.238187  | -6.238187  |
| 308 | -11.1001 | -11.100111 | -11.100111 |
| 309 | -3.06216 | -3.062164  | -3.062164  |
| 310 | -2.1751  | -2.175097  | -2.175097  |
| 311 | -3.5607  | -3.560699  | -3.560699  |
| 312 | 1.584089 | 1.584089   | 1.584089   |
| 313 | -5.55219 | -5.552193  | -5.552193  |
| 314 | -3.64056 | -3.640561  | -3.640561  |
| 315 | -4.39468 | -4.394675  | -4.394675  |
| 316 | -5.08202 | -5.082019  | -5.082019  |
| 317 | -3.8169  | -3.816897  | -3.816897  |
| 318 | -1.22982 | -1.229816  | -1.229816  |
| 319 | -3.09318 | -3.093184  | -3.093184  |
| 320 | -15.3593 | -15.359327 | -15.359327 |
| 321 | -9.70906 | -9.709064  | -9.709064  |

Cond..S2(b)

| Seq | PBP3       | PBP3_F533L | PBP3_T91A  |
|-----|------------|------------|------------|
| 322 | -2.759783  | -2.759783  | -2.759783  |
| 323 | -2.109875  | -2.109875  | -2.109875  |
| 324 | -1.983749  | -1.983749  | -1.983749  |
| 325 | -1.380488  | -1.380488  | -1.380488  |
| 326 | -11.900695 | -11.900695 | -11.900695 |
| 327 | 0.813435   | 0.813435   | 0.813435   |
| 328 | 0.486736   | 0.486736   | 0.486736   |
| 329 | -3.231621  | -3.231621  | -3.231621  |
| 330 | 1.188286   | 1.188286   | 1.188286   |
| 331 | -2.11436   | -2.11436   | -2.11436   |
| 332 | -0.982747  | -0.982747  | -0.982747  |
| 333 | 1.008296   | 1.008296   | 1.008296   |
| 334 | 1.406461   | 1.406461   | 1.406461   |
| 335 | -0.82566   | -0.82566   | -0.82566   |
| 336 | -1.188459  | -1.188459  | -1.188459  |
| 337 | 2.939057   | 2.939057   | 2.939057   |
| 338 | 1.009133   | 1.009133   | 1.009133   |
| 339 | 3.334102   | 3.334102   | 3.334102   |
| 340 | 2.399111   | 2.399111   | 2.399111   |
| 341 | 0.878936   | 0.878936   | 0.878936   |
| 342 | 2.069689   | 2.069689   | 2.069689   |
| 343 | 3.77411    | 3.77411    | 3.77411    |
| 344 | 4.823307   | 4.823307   | 4.823307   |
| 345 | 3.444824   | 3.444824   | 3.444824   |
| 346 | 4.574886   | 4.574886   | 4.574886   |
| 347 | 4.009524   | 4.009524   | 4.009524   |
| 348 | 4.031747   | 4.031747   | 4.031747   |
| 349 | 9.282671   | 9.282671   | 9.282671   |
| 350 | 3.222213   | 3.222213   | 3.222213   |
| 351 | 5.392809   | 5.392809   | 5.392809   |
| 352 | 4.684128   | 4.684128   | 4.684128   |
| 353 | 6.136354   | 6.136354   | 6.136354   |
| 354 | 4.387161   | 4.387161   | 4.387161   |
| 355 | 3.091518   | 3.091518   | 3.091518   |
| 356 | 1.867105   | 1.867105   | 1.867105   |
| 357 | 1.675908   | 1.675908   | 1.675908   |
| 358 | 1.561283   | 1.561283   | 1.561283   |
| 359 | 1.89144    | 1.89144    | 1.89144    |
| 360 | 1.90202    | 1.90202    | 1.90202    |
| 361 | 0.016626   | 0.016626   | 0.016626   |
| 362 | -8.439427  | -8.439427  | -8.439427  |
| 363 | 2.052365   | 2.052365   | 2.052365   |
| 364 | 0.72034    | 0.72034    | 0.72034    |

| Seq | PBP3     | PBP3_F533L | PBP3_T91A  |
|-----|----------|------------|------------|
| 365 | 1.45429  | 1.45429    | 1.45429    |
| 366 | 1.145696 | 1.145696   | 1.145696   |
| 367 | 0.224886 | 0.224886   | 0.224886   |
| 368 | 0.292527 | 0.292527   | 0.292527   |
| 369 | -1.19871 | -1.19871   | -1.19871   |
| 370 | -0.78644 | -0.786442  | -0.786442  |
| 371 | -0.79275 | -0.792753  | -0.792753  |
| 372 | -0.2289  | -0.228901  | -0.228901  |
| 373 | -0.44514 | -0.44514   | -0.44514   |
| 374 | -6.80813 | -6.808131  | -6.808131  |
| 375 | -1.5988  | -1.598798  | -1.598798  |
| 376 | -7.69988 | -7.699876  | -7.699876  |
| 377 | -1.46045 | -1.460448  | -1.460448  |
| 378 | -4.43613 | -4.436129  | -4.436129  |
| 379 | -7.06657 | -7.066569  | -7.066569  |
| 380 | -8.72066 | -8.720664  | -8.720664  |
| 381 | 0.242308 | 0.242308   | 0.242308   |
| 382 | -8.78412 | -8.784117  | -8.784117  |
| 383 | -5.99909 | -5.999093  | -5.999093  |
| 384 | -7.43025 | -7.430249  | -7.430249  |
| 385 | -10.7939 | -10.793929 | -10.793929 |
| 386 | -3.20305 | -3.203048  | -3.203048  |
| 387 | -2.71726 | -2.717264  | -2.717264  |
| 388 | 0.13843  | 0.13843    | 0.13843    |
| 389 | -11.5609 | -11.560867 | -11.560867 |
| 390 | -1.50574 | -1.505742  | -1.505742  |
| 391 | -2.81379 | -2.813793  | -2.813793  |
| 392 | -4.31327 | -4.313272  | -4.313272  |
| 393 | 1.988842 | 1.988842   | 1.988842   |
| 394 | -4.30965 | -4.309649  | -4.309649  |
| 395 | 0        | 0          | 0          |
| 396 | -0.70935 | -0.709351  | -0.709351  |
| 397 | -0.97311 | -0.973113  | -0.973113  |
| 398 | -4.45834 | -4.458343  | -4.458343  |
| 399 | -1.43258 | -1.432584  | -1.432584  |
| 400 | -1.20831 | -1.208314  | -1.208314  |
| 401 | -1.98701 | -1.987009  | -1.987009  |
| 402 | -1.02444 | -1.024442  | -1.024442  |
| 403 | -1.25895 | -1.258948  | -1.258948  |
| 404 | -1.26372 | -1.263719  | -1.263719  |
| 405 | -1.99668 | -1.996684  | -1.996684  |
| 406 | -2.43517 | -2.435165  | -2.435165  |
| 407 | -3.13814 | -3.138138  | -3.138138  |

Cond..S2(b)

| Seq | PBP3       | PBP3_F533L | PBP3_T91A  |
|-----|------------|------------|------------|
| 408 | -6.653034  | -6.653034  | -6.653034  |
| 409 | -2.254355  | -2.254355  | -2.254355  |
| 410 | 4.586899   | 4.586899   | 4.586899   |
| 411 | -2.289442  | -2.289442  | -2.289442  |
| 412 | -1.249961  | -1.249961  | -1.249961  |
| 413 | -0.827016  | -0.827016  | -0.827016  |
| 414 | -0.597214  | -0.597214  | -0.597214  |
| 415 | -2.953864  | -2.953864  | -2.953864  |
| 416 | -3.031334  | -3.031334  | -3.031334  |
| 417 | -2.382327  | -2.382327  | -2.382327  |
| 418 | -3.74248   | -3.74248   | -3.74248   |
| 419 | -4.595704  | -4.595704  | -4.595704  |
| 420 | -4.313155  | -4.313155  | -4.313155  |
| 421 | -5.080159  | -5.080159  | -5.080159  |
| 422 | -5.448838  | -5.448838  | -5.448838  |
| 423 | -5.485667  | -5.485667  | -5.485667  |
| 424 | -5.429442  | -5.429442  | -5.429442  |
| 425 | -4.648523  | -4.648523  | -4.648523  |
| 426 | -4.962823  | -4.962823  | -4.962823  |
| 427 | -6.796395  | -6.796395  | -6.796395  |
| 428 | -7.698918  | -7.698918  | -7.698918  |
| 429 | -14.024528 | -14.024528 | -14.024528 |
| 430 | -2.61543   | -2.61543   | -2.61543   |
| 431 | -4.674855  | -4.674855  | -4.674855  |
| 432 | -1.221134  | -1.221134  | -1.221134  |
| 433 | -5.952161  | -5.952161  | -5.952161  |
| 434 | -0.449807  | -0.449807  | -0.449807  |
| 435 | -1.134358  | -1.134358  | -1.134358  |
| 436 | -1.336641  | -1.336641  | -1.336641  |
| 437 | -1.060848  | -1.060848  | -1.060848  |
| 438 | -0.498417  | -0.498417  | -0.498417  |
| 439 | -0.945531  | -0.945531  | -0.945531  |
| 440 | 3.114027   | 3.114027   | 3.114027   |
| 441 | -0.299822  | -0.299822  | -0.299822  |
| 442 | -2.006474  | -2.006474  | -2.006474  |
| 443 | -3.506724  | -3.506724  | -3.506724  |
| 444 | -1.026674  | -1.026674  | -1.026674  |
| 445 | 4.032765   | 4.032765   | 4.032765   |
| 446 | -0.861708  | -0.861708  | -0.861708  |
| 447 | -0.351764  | -0.351764  | -0.351764  |
| 448 | 4.755366   | 4.755366   | 4.755366   |
| 449 | -4.238696  | -4.238696  | -4.238696  |
| 450 | -4.314508  | -4.314508  | -4.314508  |

| Seq | PBP3     | PBP3_F533L | PBP3_T91A |
|-----|----------|------------|-----------|
| 451 | 1.478508 | 1.478508   | 1.478508  |
| 452 | 2.303762 | 2.303762   | 2.303762  |
| 453 | 2.525182 | 2.525182   | 2.525182  |
| 454 | 1.589902 | 1.589902   | 1.589902  |
| 455 | 1.678883 | 1.678883   | 1.678883  |
| 456 | 0.626251 | 0.626251   | 0.626251  |
| 457 | 0.352052 | 0.352052   | 0.352052  |
| 458 | 1.692463 | 1.692463   | 1.692463  |
| 459 | 1.886061 | 1.886061   | 1.886061  |
| 460 | 1.106451 | 1.106451   | 1.106451  |
| 461 | -0.42247 | -0.422471  | -0.422471 |
| 462 | -0.022   | -0.021997  | -0.021997 |
| 463 | 0.851027 | 0.851027   | 0.851027  |
| 464 | 0.385104 | 0.385104   | 0.385104  |
| 465 | -0.52478 | -0.524777  | -0.524777 |
| 466 | -0.09252 | -0.092524  | -0.092524 |
| 467 | 3.442893 | 3.442893   | 3.442893  |
| 468 | 2.630651 | 2.630651   | 2.630651  |
| 469 | 2.699681 | 2.699681   | 2.699681  |
| 470 | 5.325842 | 5.325842   | 5.325842  |
| 471 | -1.15804 | -1.158036  | -1.158036 |
| 472 | 2.386218 | 2.386218   | 2.386218  |
| 473 | 3.590479 | 3.590479   | 3.590479  |
| 474 | 1.91777  | 1.91777    | 1.91777   |
| 475 | 2.455356 | 2.455356   | 2.455356  |
| 476 | -2.1303  | -2.1303    | -2.1303   |
| 477 | -3.77526 | -3.775264  | -3.775264 |
| 478 | -6.47322 | -6.47322   | -6.47322  |
| 479 | -1.05531 | -1.055305  | -1.055305 |
| 480 | -0.15195 | -0.151952  | -0.151952 |
| 481 | -0.10035 | -0.100346  | -0.100346 |
| 482 | 1.422817 | 1.422817   | 1.422817  |
| 483 | -6.76726 | -6.767256  | -6.767256 |
| 484 | 0.630942 | 0.630942   | 0.630942  |
| 485 | -2.20765 | -2.207646  | -2.207646 |
| 486 | 5.41982  | 5.41982    | 5.41982   |
| 487 | 0.985268 | 0.985268   | 0.985268  |
| 488 | 1.587181 | 1.587181   | 1.587181  |
| 489 | -0.1183  | -0.1183    | -0.1183   |
| 490 | -1.84251 | -1.842513  | -1.842513 |
| 491 | -2.1209  | -2.120899  | -2.120899 |
| 492 | -1.64748 | -1.647476  | -1.647476 |
| 493 | 3.144405 | 3.144405   | 3.144405  |

Cond..S2(b)

| Seq | PBP3       | PBP3_F533L | PBP3_T91A  |
|-----|------------|------------|------------|
| 494 | 2.471418   | 2.471418   | 2.471418   |
| 495 | 4.425303   | 4.425303   | 4.425303   |
| 496 | 0.369261   | 0.369261   | 0.369261   |
| 497 | -3.33652   | -3.33652   | -3.33652   |
| 498 | 1.328067   | 1.328067   | 1.328067   |
| 499 | 2.567255   | 2.567255   | 2.567255   |
| 500 | 2.986002   | 2.986002   | 2.986002   |
| 501 | 4.643614   | 4.643614   | 4.643614   |
| 502 | 3.37398    | 3.37398    | 3.37398    |
| 503 | 4.332665   | 4.332665   | 4.332665   |
| 504 | 2.197811   | 2.197811   | 2.197811   |
| 505 | 1.592576   | 1.592576   | 1.592576   |
| 506 | 1.879388   | 1.879388   | 1.879388   |
| 507 | 1.253092   | 1.253092   | 1.253092   |
| 508 | 2.359178   | 2.359178   | 2.359178   |
| 509 | 4.215202   | 4.215202   | 4.215202   |
| 510 | 0.593611   | 0.593611   | 0.593611   |
| 511 | -0.147788  | -0.147788  | -0.147788  |
| 512 | -12.324711 | -12.324711 | -12.324711 |
| 513 | 0.431754   | 0.431754   | 0.431754   |
| 514 | 0.770053   | 0.770053   | 0.770053   |
| 515 | 0.870125   | 0.870125   | 0.870125   |
| 516 | -3.931735  | -3.931735  | -3.931735  |
| 517 | -1.466974  | -1.466974  | -1.466974  |
| 518 | -1.17249   | -1.17249   | -1.17249   |
| 519 | -0.819483  | -0.819483  | -0.819483  |
| 520 | -2.195812  | -2.195812  | -2.195812  |
| 521 | -4.14349   | -4.14349   | -4.14349   |
| 522 | -4.978156  | -4.978156  | -4.978156  |
| 523 | -4.839555  | -4.839555  | -4.839555  |
| 524 | -3.086738  | -3.086738  | -3.086738  |
| 525 | -1.21939   | -1.21939   | -1.21939   |
| 526 | -0.747572  | -0.747572  | -0.747572  |
| 527 | -4.753793  | -4.753793  | -4.753793  |
| 528 | -1.21534   | -1.21534   | -1.21534   |
| 529 | -2.780533  | -2.780533  | -2.780533  |
| 530 | -1.061781  | -1.061781  | -1.061781  |
| 531 | 4.129931   | 4.129931   | 4.129931   |
| 532 | -1.568366  | -1.568366  | -1.568366  |
| 533 | 0.46921    | 0.46921    | 0.46921    |
| 534 | -6.955464  | -6.955464  | -6.955464  |
| 535 | 9.108323   | 9.108323   | 9.108323   |
| 536 | 8.081997   | 8.081997   | 8.081997   |
| 537 | 7.869197   | 7.869197   | 7.869197   |

| Seq | PBP3     | PBP3_F533L | PBP3_T91A |
|-----|----------|------------|-----------|
| 538 | 8.916662 | 8.916662   | 8.916662  |
| 539 | 7.576942 | 7.576942   | 7.576942  |
| 540 | 4.902357 | 4.902357   | 4.902357  |
| 541 | 4.795178 | 4.795178   | 4.795178  |
| 542 | 4.683833 | 4.683833   | 4.683833  |
| 543 | 3.082038 | 3.082038   | 3.082038  |
| 544 | 1.291142 | 1.291142   | 1.291142  |
| 545 | 0.261338 | 0.261338   | 0.261338  |
| 546 | -0.62743 | -0.627425  | -0.627425 |
| 547 | -1.00015 | -1.000154  | -1.000154 |
| 548 | -0.23629 | -0.236289  | -0.236289 |
| 549 | -2.85228 | -2.852277  | -2.852277 |
| 550 | -4.49535 | -4.495346  | -4.495346 |
| 551 | -4.65822 | -4.658216  | -4.658216 |
| 552 | -3.17919 | -3.179193  | -3.179193 |
| 553 | -5.26263 | -5.262632  | -5.262632 |
| 554 | -8.47992 | -8.479922  | -8.479922 |
| 555 | -3.56506 | -3.565063  | -3.565063 |
| 556 | -7.5424  | -7.542395  | -7.542395 |
| 557 | -4.69544 | -4.695438  | -4.695438 |
| 558 | -3.90235 | -3.902352  | -3.902352 |
| 559 | 0        | 0          | 0         |
