# Supplementary material for: Cefiderocol susceptibility endows hope in treating carbapenem-resistant Pseudomonas aeruginosa : insights from in vitro and in silico evidence
Source: Royal Society of Chemistry journal article supplement (doi:10.1039/d4ra04302b), 2024-01-01
Supplement: d4ra04302b3.pdf [file d4ra04302b3.pdf]

Supplementary File-S3 (Conservation scores)

| SEQ | CONFIDENCE SCORE (9=conserved, 1=variable) |            |           |
|-----|--------------------------------------------|------------|-----------|
|     | PBP3                                       | PBP3_F533L | PBP3_T91A |
| 56  | 7                                          | 8          | 8         |
| 57  | 3                                          | 3          | 2         |
| 58  | 6                                          | 7          | 6         |
| 59  | 4                                          | 1          | 3         |
| 60  | 7                                          | 7          | 7         |
| 61  | 4                                          | 3          | 4         |
| 62  | 9                                          | 9          | 9         |
| 63  | 9                                          | 9          | 9         |
| 64  | 4                                          | 4          | 3         |
| 65  | 9                                          | 9          | 8         |
| 66  | 3                                          | 3          | 2         |
| 67  | 9                                          | 9          | 9         |
| 68  | 9                                          | 9          | 9         |
| 69  | 7                                          | 7          | 5         |
| 70  | 8                                          | 6          | 8         |
| 71  | 4                                          | 4          | 3         |
| 72  | 3                                          | 4          | 4         |
| 73  | 9                                          | 9          | 9         |
| 74  | 9                                          | 9          | 9         |
| 75  | 5                                          | 6          | 5         |
| 76  | 9                                          | 9          | 9         |
| 77  | 6                                          | 7          | 6         |
| 78  | 7                                          | 7          | 6         |
| 79  | 7                                          | 7          | 7         |
| 80  | 1                                          | 1          | 2         |
| 81  | 7                                          | 8          | 7         |
| 82  | 6                                          | 6          | 4         |
| 83  | 4                                          | 5          | 6         |
| 84  | 6                                          | 7          | 7         |
| 85  | 6                                          | 7          | 5         |
| 86  | 8                                          | 8          | 8         |
| 87  | 3                                          | 3          | 2         |
| 88  | 3                                          | 2          | 3         |
| 89  | 5                                          | 4          | 4         |
| 90  | 1                                          | 1          | 1         |
| 91  | 1                                          | 1          | 2         |
| 92  | 1                                          | 1          | 1         |
| 93  | 1                                          | 1          | 1         |
| 94  | 1                                          | 1          | 1         |
| 95  | 4                                          | 4          | 3         |
| 96  | 4                                          | 4          | 5         |
| 97  | 1                                          | 1          | 1         |
| 98  | 1                                          | 1          | 1         |

| SEQ | CONFIDENCE SCORE (9=conserved, 1=variable) |            |           |
|-----|--------------------------------------------|------------|-----------|
|     | PBP3                                       | PBP3_F533L | PBP3_T91A |
| 99  | 8                                          | 7          | 7         |
| 100 | 8                                          | 8          | 8         |
| 101 | 1                                          | 1          | 1         |
| 102 | 3                                          | 3          | 3         |
| 103 | 8                                          | 7          | 8         |
| 104 | 1                                          | 1          | 1         |
| 105 | 2                                          | 2          | 2         |
| 106 | 2                                          | 1          | 1         |
| 107 | 1                                          | 1          | 1         |
| 108 | 1                                          | 1          | 1         |
| 109 | 1                                          | 1          | 2         |
| 110 | 5                                          | 6          | 5         |
| 111 | 1                                          | 1          | 1         |
| 112 | 1                                          | 1          | 1         |
| 113 | 4                                          | 4          | 5         |
| 114 | 4                                          | 5          | 6         |
| 115 | 1                                          | 1          | 1         |
| 116 | 2                                          | 2          | 1         |
| 117 | 2                                          | 3          | 1         |
| 118 | 1                                          | 2          | 3         |
| 119 | 1                                          | 1          | 1         |
| 120 | 4                                          | 4          | 4         |
| 121 | 3                                          | 4          | 4         |
| 122 | 9                                          | 9          | 8         |
| 123 | 6                                          | 6          | 6         |
| 124 | 6                                          | 7          | 7         |
| 125 | 6                                          | 6          | 6         |
| 126 | 6                                          | 5          | 5         |
| 127 | 9                                          | 9          | 9         |
| 128 | 6                                          | 6          | 6         |
| 129 | 5                                          | 5          | 4         |
| 130 | 3                                          | 3          | 3         |
| 131 | 6                                          | 5          | 5         |
| 132 | 2                                          | 3          | 2         |
| 133 | 1                                          | 2          | 2         |
| 134 | 7                                          | 8          | 7         |
| 135 | 1                                          | 1          | 1         |
| 136 | 2                                          | 2          | 1         |
| 137 | 6                                          | 6          | 6         |
| 138 | 1                                          | 1          | 1         |
| 139 | 3                                          | 2          | 2         |
| 140 | 7                                          | 7          | 7         |
| 141 | 1                                          | 1          | 1         |

Contd..S3

| SEQ | CONFIDENCE SCORE (9=conserved, 1=variable) |            |           |
|-----|--------------------------------------------|------------|-----------|
|     | PBP3                                       | PBP3_F533L | PBP3_T91A |
| 142 | 6                                          | 5          | 5         |
| 143 | 2                                          | 2          | 3         |
| 144 | 9                                          | 9          | 9         |
| 145 | 6                                          | 6          | 7         |
| 146 | 1                                          | 1          | 1         |
| 147 | 1                                          | 1          | 2         |
| 148 | 3                                          | 3          | 2         |
| 149 | 2                                          | 1          | 2         |
| 150 | 8                                          | 8          | 8         |
| 151 | 4                                          | 4          | 5         |
| 152 | 5                                          | 6          | 4         |
| 153 | 9                                          | 9          | 9         |
| 154 | 4                                          | 3          | 5         |
| 155 | 9                                          | 9          | 9         |
| 156 | 9                                          | 9          | 9         |
| 157 | 5                                          | 6          | 6         |
| 158 | 6                                          | 6          | 5         |
| 159 | 6                                          | 6          | 6         |
| 160 | 6                                          | 6          | 6         |
| 161 | 5                                          | 5          | 6         |
| 162 | 8                                          | 7          | 7         |
| 163 | 7                                          | 7          | 7         |
| 164 | 4                                          | 5          | 5         |
| 165 | 6                                          | 6          | 5         |
| 166 | 9                                          | 9          | 9         |
| 167 | 6                                          | 6          | 7         |
| 168 | 8                                          | 8          | 8         |
| 169 | 7                                          | 7          | 6         |
| 170 | 5                                          | 5          | 3         |
| 171 | 8                                          | 8          | 9         |
| 172 | 6                                          | 5          | 6         |
| 173 | 1                                          | 1          | 1         |
| 174 | 9                                          | 9          | 9         |
| 175 | 7                                          | 7          | 8         |
| 176 | 8                                          | 8          | 8         |
| 177 | 9                                          | 9          | 9         |
| 178 | 3                                          | 3          | 4         |
| 179 | 9                                          | 9          | 9         |
| 180 | 5                                          | 5          | 6         |
| 181 | 5                                          | 5          | 5         |
| 182 | 4                                          | 4          | 3         |
| 183 | 6                                          | 6          | 6         |
| 184 | 1                                          | 1          | 1         |

| SEQ | CONFIDENCE SCORE (9=conserved, 1=variable) |            |           |
|-----|--------------------------------------------|------------|-----------|
|     | PBP3                                       | PBP3_F533L | PBP3_T91A |
| 185 | 1                                          | 1          | 1         |
| 186 | 9                                          | 9          | 9         |
| 187 | 4                                          | 3          | 2         |
| 188 | 8                                          | 9          | 8         |
| 189 | 2                                          | 1          | 1         |
| 190 | 1                                          | 2          | 1         |
| 191 | 8                                          | 7          | 8         |
| 192 | 3                                          | 3          | 3         |
| 193 | 5                                          | 5          | 6         |
| 194 | 4                                          | 2          | 3         |
| 195 | 7                                          | 6          | 7         |
| 196 | 5                                          | 5          | 5         |
| 197 | 6                                          | 6          | 7         |
| 198 | 9                                          | 9          | 9         |
| 199 | 6                                          | 6          | 7         |
| 200 | 2                                          | 1          | 2         |
| 201 | 7                                          | 8          | 8         |
| 202 | 5                                          | 5          | 5         |
| 203 | 3                                          | 3          | 3         |
| 204 | 6                                          | 6          | 6         |
| 205 | 5                                          | 5          | 5         |
| 206 | 4                                          | 3          | 5         |
| 207 | 3                                          | 3          | 3         |
| 208 | 1                                          | 2          | 2         |
| 209 | 1                                          | 1          | 1         |
| 210 | 1                                          | 1          | 1         |
| 211 | 1                                          | 1          | 1         |
| 212 | 1                                          | 1          | 1         |
| 213 | 4                                          | 4          | 4         |
| 214 | 2                                          | 1          | 2         |
| 215 | 2                                          | 3          | 1         |
| 216 | 8                                          | 8          | 8         |
| 217 | 2                                          | 2          | 1         |
| 218 | 5                                          | 5          | 6         |
| 219 | 4                                          | 5          | 4         |
| 220 | 1                                          | 1          | 1         |
| 221 | 9                                          | 9          | 9         |
| 222 | 8                                          | 9          | 9         |
| 223 | 8                                          | 8          | 7         |
| 224 | 9                                          | 9          | 9         |
| 225 | 4                                          | 4          | 4         |
| 226 | 6                                          | 6          | 6         |
| 227 | 7                                          | 7          | 6         |

Contd..S3

| SEQ | CONFIDENCE SCORE (9=conserved, 1=variable) |            |           |
|-----|--------------------------------------------|------------|-----------|
|     | PBP3                                       | PBP3_F533L | PBP3_T91A |
| 228 | 9                                          | 9          | 9         |
| 229 | 5                                          | 5          | 5         |
| 230 | 5                                          | 4          | 5         |
| 231 | 8                                          | 8          | 8         |
| 232 | 8                                          | 7          | 7         |
| 233 | 5                                          | 5          | 6         |
| 234 | 7                                          | 6          | 7         |
| 235 | 8                                          | 8          | 8         |
| 236 | 4                                          | 5          | 5         |
| 237 | 3                                          | 2          | 2         |
| 238 | 6                                          | 7          | 8         |
| 239 | 7                                          | 7          | 7         |
| 240 | 1                                          | 1          | 1         |
| 241 | 1                                          | 1          | 1         |
| 242 | 3                                          | 3          | 4         |
| 243 | 1                                          | 2          | 1         |
| 244 | 9                                          | 9          | 9         |
| 245 | 4                                          | 4          | 3         |
| 246 | 7                                          | 7          | 6         |
| 247 | 7                                          | 7          | 8         |
| 248 | 6                                          | 6          | 6         |
| 249 | 5                                          | 4          | 3         |
| 250 | 8                                          | 8          | 8         |
| 251 | 7                                          | 7          | 6         |
| 252 | 5                                          | 6          | 6         |
| 253 | 8                                          | 8          | 8         |
| 254 | 6                                          | 6          | 6         |
| 255 | 1                                          | 1          | 1         |
| 256 | 8                                          | 8          | 8         |
| 257 | 9                                          | 9          | 9         |
| 258 | 8                                          | 8          | 8         |
| 259 | 6                                          | 6          | 6         |
| 260 | 9                                          | 9          | 9         |
| 261 | 9                                          | 9          | 9         |
| 262 | 8                                          | 8          | 8         |
| 263 | 7                                          | 7          | 8         |
| 264 | 8                                          | 8          | 8         |
| 265 | 4                                          | 3          | 4         |
| 266 | 9                                          | 9          | 9         |
| 267 | 7                                          | 6          | 6         |
| 268 | 5                                          | 6          | 6         |
| 269 | 8                                          | 8          | 8         |
| 270 | 8                                          | 8          | 9         |

| SEQ | CONFIDENCE SCORE (9=conserved, 1=variable) |            |           |
|-----|--------------------------------------------|------------|-----------|
|     | PBP3                                       | PBP3_F533L | PBP3_T91A |
| 271 | 9                                          | 9          | 9         |
| 272 | 4                                          | 4          | 4         |
| 273 | 5                                          | 6          | 5         |
| 274 | 1                                          | 1          | 1         |
| 275 | 1                                          | 1          | 1         |
| 276 | 1                                          | 1          | 1         |
| 277 | 1                                          | 1          | 1         |
| 278 | 1                                          | 1          | 1         |
| 279 | 1                                          | 1          | 1         |
| 280 | 1                                          | 1          | 1         |
| 281 | 3                                          | 4          | 3         |
| 282 | 9                                          | 9          | 9         |
| 283 | 9                                          | 9          | 9         |
| 284 | 8                                          | 9          | 8         |
| 285 | 8                                          | 8          | 8         |
| 286 | 4                                          | 6          | 5         |
| 287 | 7                                          | 7          | 7         |
| 288 | 9                                          | 9          | 9         |
| 289 | 3                                          | 3          | 3         |
| 290 | 7                                          | 7          | 6         |
| 291 | 9                                          | 9          | 9         |
| 292 | 9                                          | 9          | 9         |
| 293 | 9                                          | 9          | 9         |
| 294 | 9                                          | 9          | 9         |
| 295 | 8                                          | 8          | 8         |
| 296 | 6                                          | 5          | 5         |
| 297 | 9                                          | 9          | 9         |
| 298 | 7                                          | 6          | 6         |
| 299 | 6                                          | 6          | 5         |
| 300 | 6                                          | 6          | 6         |
| 301 | 5                                          | 4          | 4         |
| 302 | 8                                          | 7          | 7         |
| 303 | 7                                          | 7          | 7         |
| 304 | 8                                          | 8          | 9         |
| 305 | 8                                          | 7          | 8         |
| 306 | 6                                          | 6          | 7         |
| 307 | 4                                          | 5          | 5         |
| 308 | 6                                          | 6          | 5         |
| 309 | 1                                          | 2          | 1         |
| 310 | 3                                          | 4          | 5         |
| 311 | 2                                          | 1          | 1         |
| 312 | 3                                          | 2          | 3         |
| 313 | 2                                          | 2          | 1         |

Contd..S3

| SEQ | CONFIDENCE SCORE (9=conserved, 1=variable) |            |           |
|-----|--------------------------------------------|------------|-----------|
|     | PBP3                                       | PBP3_F533L | PBP3_T91A |
| 314 | 5                                          | 5          | 6         |
| 315 | 1                                          | 1          | 1         |
| 316 | 6                                          | 6          | 5         |
| 317 | 5                                          | 4          | 4         |
| 318 | 8                                          | 8          | 9         |
| 319 | 5                                          | 4          | 4         |
| 320 | 6                                          | 6          | 6         |
| 321 | 7                                          | 9          | 8         |
| 322 | 1                                          | 1          | 1         |
| 323 | 2                                          | 4          | 3         |
| 324 | 1                                          | 1          | 2         |
| 325 | 5                                          | 5          | 5         |
| 326 | 2                                          | 4          | 4         |
| 327 | 1                                          | 1          | 1         |
| 328 | 3                                          | 4          | 3         |
| 329 | 4                                          | 5          | 4         |
| 330 | 8                                          | 8          | 8         |
| 331 | 4                                          | 4          | 5         |
| 332 | 9                                          | 9          | 9         |
| 333 | 2                                          | 2          | 1         |
| 334 | 6*                                         | 4*         | 6         |
| 335 | 4                                          | 3          | 5         |
| 336 | 5                                          | 4          | 4         |
| 337 | 3                                          | 3          | 4         |
| 338 | 5                                          | 5          | 6         |
| 339 | 1                                          | 1          | 1         |
| 340 | 6                                          | 6          | 6         |
| 341 | 5                                          | 6          | 5         |
| 342 | 5                                          | 4          | 4         |
| 343 | 3                                          | 3          | 2         |
| 344 | 2                                          | 3          | 2         |
| 345 | 6                                          | 6          | 6         |
| 346 | 7                                          | 6          | 6         |
| 347 | 5                                          | 6          | 5         |
| 348 | 6                                          | 7          | 6         |
| 349 | 9                                          | 9          | 9         |
| 350 | 9                                          | 9          | 9         |
| 351 | 9                                          | 9          | 9         |
| 352 | 7                                          | 7          | 7         |
| 353 | 8                                          | 8          | 8         |
| 354 | 5                                          | 5          | 6         |
| 355 | 6                                          | 6          | 6         |
| 356 | 7                                          | 8          | 8         |

| SEQ | CONFIDENCE SCORE (9=conserved, 1=variable) |            |           |
|-----|--------------------------------------------|------------|-----------|
|     | PBP3                                       | PBP3_F533L | PBP3_T91A |
| 357 | 6                                          | 6          | 6         |
| 358 | 7                                          | 8          | 7         |
| 359 | 4                                          | 5          | 6         |
| 360 | 3                                          | 2          | 2         |
| 361 | 5                                          | 6          | 6         |
| 362 | 1                                          | 2          | 4         |
| 363 | 1                                          | 1          | 1         |
| 364 | 2                                          | 3          | 5         |
| 365 | 1                                          | 2          | 2         |
| 366 | 5                                          | 5          | 5         |
| 367 | 2                                          | 4          | 4         |
| 368 | 1                                          | 1          | 1         |
| 369 | 3                                          | 3          | 3         |
| 370 | 3                                          | 4          | 3         |
| 371 | 1                                          | 2          | 2         |
| 372 | 1                                          | 1          | 1         |
| 373 | 4                                          | 3          | 5         |
| 374 | 9                                          | 9          | 9         |
| 375 | 7                                          | 5          | 6         |
| 376 | 8                                          | 9          | 9         |
| 377 | 4                                          | 4          | 4         |
| 378 | 1                                          | 1          | 1         |
| 379 | 7                                          | 7          | 7         |
| 380 | 2                                          | 4          | 4         |
| 381 | 4                                          | 4          | 4         |
| 382 | 5                                          | 5          | 4         |
| 383 | 7                                          | 7          | 8         |
| 384 | 7                                          | 7          | 8         |
| 385 | 8                                          | 9          | 9         |
| 386 | 9                                          | 9          | 9         |
| 387 | 5                                          | 5          | 4         |
| 388 | 2                                          | 1          | 3         |
| 389 | 9                                          | 9          | 9         |
| 390 | 2                                          | 2          | 1         |
| 391 | 6                                          | 5          | 6         |
| 392 | 4                                          | 4          | 5         |
| 393 | 1                                          | 2          | 1         |
| 394 | 1                                          | 2          | 1         |
| 395 | 1                                          | 2          | 1         |
| 396 | 2                                          | 2          | 1         |
| 397 | 7                                          | 9          | 7         |
| 398 | 5                                          | 4          | 5         |
| 399 | 2                                          | 3          | 1         |

Contd..S3

| SEQ | CONFIDENCE SCORE (9=conserved, 1=variable) |            |           |
|-----|--------------------------------------------|------------|-----------|
|     | PBP3                                       | PBP3_F533L | PBP3_T91A |
| 400 | 6                                          | 6          | 5         |
| 401 | 7                                          | 7          | 7         |
| 402 | 4                                          | 5          | 6         |
| 403 | 9                                          | 8          | 8         |
| 404 | 8                                          | 8          | 8         |
| 405 | 7                                          | 7          | 5         |
| 406 | 7                                          | 7          | 7         |
| 407 | 7                                          | 7          | 7         |
| 408 | 9                                          | 9          | 9         |
| 409 | 8                                          | 9          | 9         |
| 410 | 8                                          | 9          | 8         |
| 411 | 5                                          | 6          | 5         |
| 412 | 7                                          | 7          | 7         |
| 413 | 7                                          | 7          | 7         |
| 414 | 9                                          | 9          | 8         |
| 415 | 6                                          | 6          | 5         |
| 416 | 6                                          | 6          | 5         |
| 417 | 9                                          | 9          | 9         |
| 418 | 7                                          | 7          | 6         |
| 419 | 8                                          | 8          | 8         |
| 420 | 5                                          | 5          | 5         |
| 421 | 7                                          | 8          | 8         |
| 422 | 8                                          | 7          | 7         |
| 423 | 6                                          | 6          | 6         |
| 424 | 6                                          | 5          | 5         |
| 425 | 6                                          | 6          | 6         |
| 426 | 8                                          | 9          | 9         |
| 427 | 8                                          | 7          | 8         |
| 428 | 3                                          | 4          | 5         |
| 429 | 9                                          | 9          | 9         |
| 430 | 1                                          | 1          | 1         |
| 431 | 4                                          | 3          | 2         |
| 432 | 2                                          | 4          | 4         |
| 433 | 6                                          | 5          | 5         |
| 434 | 5                                          | 6          | 6         |
| 435 | 6                                          | 6          | 7         |
| 436 | 6                                          | 6          | 6         |
| 437 | 4                                          | 4          | 5         |
| 438 | 5                                          | 5          | 5         |
| 439 | 1                                          | 1          | 2         |
| 440 | 3                                          | 2          | 3         |
| 441 | 1                                          | 1          | 1         |
| 442 | 1                                          | 1          | 1         |
| 443 | 1                                          | 1          | 1         |

| SEQ | CONFIDENCE SCORE (9=conserved, 1=variable) |            |           |
|-----|--------------------------------------------|------------|-----------|
|     | PBP3                                       | PBP3_F533L | PBP3_T91A |
| 444 | 1                                          | 1          | 1         |
| 445 | 1                                          | 1          | 5         |
| 446 | 2                                          | 2          | 2         |
| 447 | 5                                          | 6          | 5         |
| 448 | 8                                          | 8          | 7         |
| 449 | 5                                          | 4          | 4         |
| 450 | 5                                          | 6          | 6         |
| 451 | 2                                          | 1          | 1         |
| 452 | 1                                          | 1          | 2         |
| 453 | 6                                          | 5          | 7         |
| 454 | 8                                          | 8          | 8         |
| 455 | 1                                          | 1          | 1         |
| 456 | 3                                          | 1          | 2         |
| 457 | 5                                          | 6          | 5         |
| 458 | 5                                          | 4          | 4         |
| 459 | 1                                          | 1          | 1         |
| 460 | 9                                          | 8          | 8         |
| 461 | 7                                          | 7          | 8         |
| 462 | 6                                          | 5          | 7         |
| 463 | 2                                          | 1          | 1         |
| 464 | 8                                          | 8          | 8         |
| 465 | 7                                          | 6          | 6         |
| 466 | 3                                          | 2          | 2         |
| 467 | 1                                          | 1          | 2         |
| 468 | 2                                          | 4          | 1         |
| 469 | 9                                          | 9          | 9         |
| 470 | 9                                          | 9          | 9         |
| 471 | 7                                          | 6          | 7         |
| 472 | 1                                          | 1          | 1         |
| 473 | 1                                          | 2          | 2         |
| 474 | 9                                          | 9          | 9         |
| 475 | 4                                          | 4          | 4         |
| 476 | 6                                          | 7          | 6         |
| 477 | 1                                          | 1          | 2         |
| 478 | 6                                          | 7          | 6         |
| 479 | 8                                          | 8          | 8         |
| 480 | 6                                          | 4          | 5         |
| 481 | 8                                          | 8          | 8         |
| 482 | 8                                          | 8          | 8         |
| 483 | 8                                          | 9          | 9         |
| 484 | 9                                          | 9          | 9         |
| 485 | 9                                          | 9          | 9         |
| 486 | 9                                          | 9          | 9         |

Contd..S3

| SEQ | CONFIDENCE SCORE (9=conserved, 1=variable) |            |           |
|-----|--------------------------------------------|------------|-----------|
|     | PBP3                                       | PBP3_F533L | PBP3_T91A |
| 487 | 9                                          | 9          | 9         |
| 488 | 8                                          | 8          | 7         |
| 489 | 6                                          | 7          | 6         |
| 490 | 8                                          | 8          | 8         |
| 491 | 3                                          | 4          | 3         |
| 492 | 1                                          | 5*         | 6         |
| 493 | 3                                          | 7*         | 6         |
| 494 | 1                                          | 2          | 1         |
| 495 | 3                                          | 1          | 1         |
| 496 | 4                                          | 3          | 3         |
| 497 | 3                                          | 3          | 4         |
| 498 | 9                                          | 9          | 9         |
| 499 | 3                                          | 4          | 3         |
| 500 | 1                                          | 1          | 1         |
| 501 | 3                                          | 3          | 3         |
| 502 | 4                                          | 4          | 4         |
| 503 | 7                                          | 6          | 7         |
| 504 | 4                                          | 3          | 3         |
| 505 | 7                                          | 6          | 6         |
| 506 | 5                                          | 6          | 7         |
| 507 | 9                                          | 9          | 9         |
| 508 | 7                                          | 7          | 7         |
| 509 | 9                                          | 9          | 9         |
| 510 | 4                                          | 4          | 5         |
| 511 | 8                                          | 8          | 8         |
| 512 | 9                                          | 9          | 9         |
| 513 | 6                                          | 6          | 6         |
| 514 | 6                                          | 5          | 6         |
| 515 | 5                                          | 4          | 4         |
| 516 | 9                                          | 9          | 9         |
| 517 | 7                                          | 7          | 7         |
| 518 | 6                                          | 5          | 4         |
| 519 | 6                                          | 6          | 7         |
| 520 | 6                                          | 5          | 5         |
| 521 | 7                                          | 7          | 6         |
| 522 | 9                                          | 9          | 8         |
| 523 | 6                                          | 6          | 5         |
| 524 | 7                                          | 6          | 7         |
| 525 | 8                                          | 8          | 8         |
| 526 | 7                                          | 7          | 7         |
| 527 | 9                                          | 9          | 9         |
| 528 | 3                                          | 2          | 2         |
| 529 | 1                                          | 2          | 1         |

| SEQ            | CONFIDENCE SCORE (9=conserved, 1=variable) |                    |                   |
|----------------|--------------------------------------------|--------------------|-------------------|
|                | PBP3                                       | PBP3_F533L         | PBP3_T91A         |
| 530            | 2                                          | 2                  | 1                 |
| 531            | 1                                          | 1                  | 1                 |
| 532            | 5                                          | 5                  | 6                 |
| 533            | 6                                          | 6                  | 6                 |
| 534            | 8                                          | 9                  | 9                 |
| 535            | 9                                          | 8                  | 9                 |
| 536            | 1                                          | 1                  | 1                 |
| 537            | 8                                          | 8                  | 8                 |
| 538            | 9                                          | 8                  | 8                 |
| 539            | 8                                          | 9                  | 9                 |
| 540            | 9                                          | 9                  | 9                 |
| 541            | 7                                          | 8                  | 8                 |
| 542            | 9                                          | 9                  | 9                 |
| 543            | 6                                          | 6                  | 5                 |
| 544            | 3                                          | 1                  | 1                 |
| 545            | 7                                          | 7                  | 7                 |
| 546            | 7                                          | 7                  | 7                 |
| 547            | 3                                          | 2                  | 3                 |
| 548            | 2                                          | 1                  | 2                 |
| 549            | 6                                          | 6                  | 6                 |
| 550            | 9                                          | 8                  | 9                 |
| 551            | 6                                          | 6                  | 7                 |
| 552            | 2                                          | 1                  | 4                 |
| 553            | 6                                          | 5                  | 6                 |
| 554            | 7                                          | 6                  | 6                 |
| 555            | 7                                          | 7                  | 7                 |
| 556            | 2                                          | 2                  | 2                 |
| 557            | 8                                          | 8                  | 7                 |
| 558            | 8                                          | 8                  | 8                 |
| 559            | 7                                          | 8                  | 7                 |
| <b>Average</b> | <b>5.69302326</b>                          | <b>5.727699531</b> | <b>5.73611111</b> |
